# Supplementary material for: Checklist of British and Irish Hymenoptera - Cynipoidea
Source: Biodivers Data J. 2017 Mar 9;(5):e8049. doi: 10.3897/BDJ.5.e8049 (PMC5345061; doi:10.3897/BDJ.5.e8049)
Supplement: Supplementary material 2 — Checklist of British and Irish Cynipoidea [file bdj-05-e8049-s002.xlsx]

## Sheet: Sheet1
ori seq	usage	rank	Family	Subfamily	Tribe	Genus	Species	author	NOTES	Distribution	original genus	original sp spell
1	valid	Family	Cynipidae					Latreille, 1802	Liljeblad & Ronquist (1998), Ronquist (1999) and Ronquist et al. (2015) employed a series of monophyletic tribes, in the absence of strong evidence for relationships above this level. Synonymy for Cynipidae includes all names that have appeared in the British literature but does not necessarily include all Palaearctic names proposed as varieties or forms. For complete synonymy please see Melika (…
2	valid	tribe	Cynipidae		Aulacideini			Nieves-Aldrey, 1994	The availability of the name Aulacideini has been questioned and is currently being looked into. This will possibly only be solved by the ICZN
3	valid	genus	Cynipidae		Aulacideini	Aulacidea		Ashmead, 1897	Species of Aulacidea removed from the British and Irish list: [andrei (Kieffer, 1900, Aulax)]; Added by Bagnall (1931) from the gall. Discussed by Bowdrey (1999), who concluded that this record was in error.
4	syn	genus	Cynipidae			PSEUDAULAX		Ashmead,1903
5	valid	species	Cynipidae		Aulacideini		follioti	Barbotin, 1972	added by Bowdrey (1994).	England
6	valid	species	Cynipidae		Aulacideini		hieracii	(Bouché, 1834, Cynips)		England, Scotland, Wales	Cynips
7	syn	species	Cynipidae		AULACIDEINI		sabaudi	(Hartig, 1840, Aylax
8	syn	species	Cynipidae		AULACIDEINI		graminis	(Cameron, 1875, Aulax)
9	syn	species	Cynipidae		AULACIDEINI		artemisiae	(Thomson, 1877, Aulax)
10	syn	species	Cynipidae		AULACIDEINI		crassinervis	(Thomson, 1877, Aulax)
11	syn	species	Cynipidae		AULACIDEINI		foveigera	(Thomson, 1877, Aulax)
12	valid	species	Cynipidae		Aulacideini		nibletti	Quinlan & Askew, 1969		Scotland
13	valid	species	Cynipidae		Aulacideini		pilosellae	(Kieffer, 1901, Aulax)		England	Aulax
14	valid	species	Cynipidae		Aulacideini		subterminalis	Niblett, 1946		England
15	valid	species	Cynipidae		Aulacideini		tragopogonis	(Thomson, 1877, Aulax)		England	Aulax
16	syn	species	Cynipidae		Aulacideini		pigeoti	(Kieffer, 1898, Aulax)	A. pigeoti, added by Bagnall & Harrison (1930) on the basis of galls only (root collar of Tragopogon porrifolius), was synonymised by Eady & Quinlan (1963) with tragopogonis but erroneously so with hieracii in Fauna Europaea (Nieves-Aldrey, pers. comm.).		Aulax
17	valid	genus	Cynipidae		Aulacideini	Isocolus		Förster, 1869
18	syn	genus	Cynipidae		AULACIDEINI	EUBOTHRUS		Förster, 1869
19	valid	species	Cynipidae		Aulacideini		fitchi	(Kieffer, 1898, Aulax)		England	Aulax
20	valid	species	Cynipidae		Aulacideini		jaceae	(Schenck, 1863, Aulax)		England, Scotland	Aulax
21	syn	species	Cynipidae		AULACIDEINI		affinis	(Schenck, 1863, Aylax)
22	valid	species	Cynipidae		Aulacideini		scabiosae	(Giraud, 1859, Diastrophus)		England	Diastrophus
23	syn	species	Cynipidae		AULACIDEINI		areolatus	(Giraud, 1859, Diastrophus)
24	syn	species	Cynipidae		AULACIDEINI		centaureae	(Thomson, 1877, Aulax)
25	syn	species	Cynipidae		AULACIDEINI		rogenhoferi	Wachtl, 1880	Galls bracts of Centaurea scabiosa, but not now considered to be a distinct species (Nieves-Aldrey, 1994).
26	valid	genus	Cynipidae		Aulacideini	Liposthenes		Förster, 1869
27	syn	genus	Cynipidae		AULACIDEINI	LIPOSTHENUS		misspelling
28	valid	species	Cynipidae		Aulacideini		glechomae	(Linnaeus, 1758, Cynips)		England, Scotland, Wales, Isle of Man	Cynips
29	syn	species	Cynipidae		AULACIDEINI		latreillei	(Kieffer, 1898, Aulax)
30	valid	tribe	Cynipidae		Aylacini			Ashmead, 1903
31	valid	genus	Cynipidae		Aylacini	Aylax		Hartig, 1840
32	syn	genus	Cynipidae		Aylacini	AULAX		Hartig, 1843
33	valid	species	Cynipidae		Aylacini		minor	Hartig, 1840		England, Ireland
34	valid	species	Cynipidae		Aylacini		papaveris	(Perris, 1840, Diplolepis)		England, Scotland, Wales	Diplolepis
35	syn	species	Cynipidae		AYLACINI		rhoeadis	(Bouché, 1834, Cynips)
36	syn	tribe	Cynipidae		CEROPTRESINI			Nieves-Aldrey, Nylander & Ronquist, 2015
37	valid	genus	Cynipidae		Ceroptresini	Ceroptres		Hartig, 1840
38	valid	genus	Cynipidae		Ceroptresini		cerri	Mayr, 1873	Added by Jennings (2016).	England
39	syn	species	Cynipidae		CEROPTRESINI		cerriphilus	Giraud, 1911
40	syn	species	Cynipidae		CEROPTRESINI		vitripennis	Giraud, 1911
41	valid	species	Cynipidae		Ceroptresini		clavicornis	Hartig, 1840		England, Scotland, Wales, Ireland
42	syn	species	Cynipidae		CEROPTRESINI		arator	Hartig, 1841
43	valid	tribe	Cynipidae		Cynipini			Latreille, 1802[4]	Generic classification of oak-associated Cynipini follows Melika & Abrahamson (2002). As sexual and agamic generations have often been described under different names, those based on agamic generation are denoted by the suffix '-a-', those based on the sexual generation by '-s-'.
44	valid	genus	Cynipidae		Cynipini	Andricus		Hartig, 1840	Species of Andricus removed from the British and Irish list: [clementinae (Giraud, 1859, Cynips) -a-] - Added by Cameron (1893) from the gall only. An agamic female in the Morley collection at Ipswich Museum is quercusradicis. No recent records; [gallaetinctoriae (Olivier, 1791, Diplolepis) -a-] Niblett et al. (1932) state that this species was introduced in the 19th Century. [gallaeurniformis (F…
45	syn	genus	Cynipidae		CYNIPINI	APHILOTHRIX		Förster, 1869
46	syn	genus	Cynipidae		CYNIPINI	LIODORA		Förster, 1869
47	syn	genus	Cynipidae		CYNIPINI	MANDERSTJERNIA		Radoszkowski, 1866
48	syn	genus	Cynipidae		CYNIPINI	TRICHOTERAS		Ashmead, 1897
49	syn	genus	Cynipidae		CYNIPINI	PARANDRICUS		Kieffer, 1906
50	syn	genus	Cynipidae		CYNIPINI	ADLERIA		Rohwer & Fagan, 1917
51	syn	genus	Cynipidae		CYNIPINI	EUSCHMITZIA		Dettmer, 1925
52	syn	genus	Cynipidae		CYNIPINI	ONCASPIS		Dettmer, 1925
53	syn	genus	Cynipidae		CYNIPINI	DROS		Kinsey,1937
54	syn	genus	Cynipidae		CYNIPINI	DRUON		Kinsey, 1937
55	syn	genus	Cynipidae		CYNIPINI	FERON		Kinsey, 1937
56	syn	genus	Cynipidae		CYNIPINI	CONOBIOS		Kinsey, 1938
57	valid	species	Cynipidae		Cynipini		amenti	Giraud, 1859 -a-	Sexual generation catkin galls first recorded by Traill (1873). The asexual generation, described as giraudianus Dalla Torre & Kieffer, 1910, has not been recorded in Britain.	England, Scotland
58	syn	species	Cynipidae		CYNIPINI		callidoma	(Giraud, 1859, Cynips) (non Hartig, 1841) -a-
59	syn	species	Cynipidae		CYNIPINI		giraudianus	Dalla Torre and Kieffer, 1910 -a-
60	valid	species	Cynipidae		Cynipini		aries	(Giraud, 1859, Cynips) -a-	added by Leach (1999). First recorded from the agamic generation, the sexual generation was reported by Walker (2001a).	England, Wales	Cynips
61	valid	species	Cynipidae		Cynipini		callidoma	(Hartig, 1841, Cynips) -a-		England, Scotland, Wales, Ireland	Cynips
62	syn	species	Cynipidae		CYNIPINI		cirratus	Adler, 1881 -s-
63	syn	species	Cynipidae		CYNIPINI		giraudi	Wachtl, 1882 -a-
64	valid	species	Cynipidae		Cynipini		corruptrix	(Schlechtendal, 1870, Cynips) -a-	Cynips ambigua was placed by Bellido et al. (2005) in synonymy with corruptrix but previously regarded as a distinct species (Melika et al., 2000). Agamic generation reported by Harrison (1930) from Co. Durham & Forfarshire. The sexual generation was described as ambiguus forma elianae Folliot & Pujade-Villar, 2000. Form larshemi van Leeuwen & Dekhuijzen-Maasland, 1958, was described as the sexua…	England, Scotland, Ireland	Cynips
65	syn	species	Cynipidae		CYNIPINI		ambigua	(Trotter, 1899 Cynips) -a-
66	syn	species	Cynipidae		CYNIPINI		corruptrix f. elianae	Melika, Csóka & Pujade-Villar, 2000 nomen nudum -s-
67	valid	species	Cynipidae		Cynipini		?cryptobius	Wachtl, 1880 -s-	Added by Bowdrey (2015); an adult female was identified as this species by G.Melika with the proviso that it might be the sexual generation of a morphologically undescribed species known from DNA sequencing.	England
68	valid	species	Cynipidae		Cynipini		curvator	Hartig, 1840 -s-		England, Scotland, Wales, Ireland, Isle of Man
69							axilaris	Hartig, 1840 -s-
70	syn	species	Cynipidae		CYNIPINI		collaris	(Hartig, 1840, Cynips) -a-
71	syn	species	Cynipidae		CYNIPINI		roeselii	(Dahlbom, 1842, Cynips) (nomen nudum) -s-
72	syn	species	Cynipidae		CYNIPINI		dimidiatus	(Schenck, 1863, Spathegaster) -s-
73	syn	species	Cynipidae		CYNIPINI		fasciatus	Schenck, 1863 –a-
74	syn	species	Cynipidae		CYNIPINI		perfoliatus	Schenck, 1863 -s-
75	syn	species	Cynipidae		CYNIPINI		sulcata	(Förster, 1869, Liodora) -s-
76	syn	species	Cynipidae		CYNIPINI		fasciata	(Schlechtendal, 1870, Cynips) -a-
77	syn	species	Cynipidae		CYNIPINI		tegmentorum	(Schlechtendal, 1870, Cynips) -a-
78	valid	species	Cynipidae		Cynipini		foecundatrix	(Hartig, 1840, Cynips) -a-		England, Scotland, Wales, Ireland, Isle of Man	Cynips
79	syn	species	Cynipidae		CYNIPINI		fecundator	misspelling
80	syn	species	Cynipidae		CYNIPINI		quercusgemmae	(Linnaeus, 1758, Cynips)
81	syn	species	Cynipidae		CYNIPINI		gemmarum	Lacaze-Duthiers, 1853
82	syn	species	Cynipidae		CYNIPINI		gemmae	Schenck, 1863, Cynips
83	syn	species	Cynipidae		CYNIPINI		pilosus	Adler, 1881 -s-
84	valid	species	Cynipidae		Cynipini		gemmeus	(Giraud, 1859, Cynips) -a-	added by Bowdrey (2009). Previously reported by Ormerod (see Cameron, 1893), but reportedly as a leaf gall, so the record is suspect.	England	Cynips	gemmea
85	syn	species	Cynipidae		CYNIPINI		kirschbergi	(Wachtl, 1876, Aphilothrix) -a-
86	syn	species	Cynipidae		CYNIPINI		gemmae	Dalla Torre & Kieffer, 1910 -a-
87	valid	species	Cynipidae		Cynipini		?gemmicola	Kieffer, 1901	Gall recorded by Bagnall & Harrison (1919) and adult male possibly of this species by Eady & Quinlan (1963). Only the sexual generation is known, inducing bud galls of Quercus robur, collected in France (Dalla Torre & Kieffer, 1910). Bagnall & Harrison (1918) mentioned this species from Great Britain but this record requires confirmation (Eady & Quinlan, 1963). A species of uncertain status, type…	England
88	valid	species	Cynipidae		Cynipini		glandulae	(Hartig, 1840, Cynips) -a-		England, Scotland, Ireland	Cynips
89	syn	species	Cynipidae		CYNIPINI		xanthopsis	Schlechtendal, 1884 -s-
90	valid	species	Cynipidae		Cynipini		grossulariae	Giraud, 1859 -s-	added by Walker (2001b). Rearing experiments by Walker (2002) confirmed grossulariae to represent the sexual generation of a lifecycle also involving the asexual generation galls known as mayri/ panteli, a pairing also indicated by DNA sequence data (Stone et al., 2008).	England
91	syn	species	Cynipidae		CYNIPINI		mayri	(Wachtl, 1879, Aphilothrix) -a-
92	syn	species	Cynipidae		CYNIPINI		panteli	Kieffer, 1897 -a-
93	syn	species	Cynipidae		CYNIPINI		gemmellus	Belizin & Maisuradze, 1961 -s-
94	valid	species	Cynipidae		Cynipini		inflator	Hartig, 1840 -s-		England, Scotland, Wales, Ireland
95	syn	species	Cynipidae		CYNIPINI		globuli	(Hartig, 1841, Cynips) -s-
96	syn	species	Cynipidae		CYNIPINI		inflatioides	Belizin and Maisuradze, 1962 -?-
97	valid	species	Cynipidae		Cynipini		#kollari	(Hartig, 1843, Cynips) -a-	Nineteenth Century introduction (Adler and Stratton, 1894; Niblett et al., 1932).	England, Scotland, Wales, Ireland, Isle of Man	Cynips
98	syn	species	Cynipidae		CYNIPINI		lignicola	auctt. misident.
99	syn	species	Cynipidae		CYNIPINI		quercusgemmae	Christ, 1791 preocc. -a-
100	syn	species	Cynipidae		CYNIPINI		circulans	Mayr, 1870 -s-
101	valid	species	Cynipidae		Cynipini		legitimus	Wiebes-Rijks, 1980 -a-		England
102	valid	species	Cynipidae		Cynipini		lignicolus	(Hartig, 1840, Cynips) -a-		England, Scotland, Wales, Ireland, Isle of Man	Cynips	lignicola
103	syn	species	Cynipidae		CYNIPINI		var. vanheurni	van Leeuwen & Dekhuizen-Maasland, 1958 -s-
104	valid	species	Cynipidae		Cynipini		lucidus	(Hartig, 1843, Cynips) -a-	Added by Mosley (1892) from Yorkshire and by Cameron (1893) from Loch Lomond (sexual form). Not recorded subsequently until reinstated as a British species, from London specimens, by Stone & Sunnocks (1992).	England	Cynips	lucida
105	syn	species	Cynipidae		CYNIPINI		aestivalis	Giraud, 1859 -s-
106	syn	species	Cynipidae		CYNIPINI		erinaceus	(Kieffer, 1900, Adleria) -a-
107	valid	species	Cynipidae		Cynipini		malpighii	(Adler, 1881, Aphilothrix) -a-	Nomenclature follows Pujade-Villar & Melika (2000).	England, Scotland, Wales, Ireland	Aphilothrix
108	syn	species	Cynipidae		CYNIPINI		nudus	Adler, 1881 -s-
109	valid	species	Cynipidae		Cynipini		paradoxus	(Radoszkowski, 1866, Manderstjernia) -a-	Taxonomy follows Melika et al. (2000).	England, Scotland, Wales, Ireland	Manderstjernia	paradoxa
110	syn	species	Cynipidae		CYNIPINI		albipunctata	(Kaltenbach, 1867, Cynips) -a-
111	syn	species	Cynipidae		CYNIPINI		majalis	(Giraud, 1868, Cynips) preocc. -a-
112	syn	species	Cynipidae		CYNIPINI		albopunctatus	(Schlechtendal, 1870, Cynips) -a-
113	syn	species	Cynipidae		CYNIPINI		lambertoni	Kieffer, 1897 -s-
114					CYNIPINI
115	syn	species	Cynipidae		CYNIPINI		albopunctatus f. barbotini	Folliot, 1964 -s-
116	valid	species	Cynipidae		Cynipini		quadrilineatus	Hartig, 1840 -a-		England, Scotland, Wales, Ireland
117	syn	species	Cynipidae		CYNIPINI		ambiguus	Schenck, 1863 -a-
118	syn	species	Cynipidae		CYNIPINI		glabriusculus	Schenck, 1863 -a-
119	syn	species	Cynipidae		CYNIPINI		pedunculi	Schenck, 1863 -a-
120	syn	species	Cynipidae		CYNIPINI		verrucosus	Schenck, 1863 -a-
121	syn	species	Cynipidae		CYNIPINI		marginalis	(Schlechtendal, 1870, Cynips) -a-	Synonymy of marginalis and quadrilineatus established by Folliot (1964).		Cynips
122	syn	species	Cynipidae		CYNIPINI		4-lineata	(Thomson, 1877, Cynips) -a-
123	syn	species	Cynipidae		CYNIPINI		kiefferi	Pigeot, 1900 -s-
124	syn	species	Cynipidae		CYNIPINI		quadrilineatus f. kiefferi	Folliot, 1964 -s-
125	valid	species	Cynipidae		Cynipini		quercuscalicis	(Burgsdorff, 1783, Cynips) -a-		England, Scotland, Wales, Ireland	Cynips
126	syn	species	Cynipidae		CYNIPINI		cerri	(Beyerinck, 1896, Cynips) -s-
127	syn	species	Cynipidae		CYNIPINI		beyerincki	Trotter, 1899 -s-
128	valid	species	Cynipidae		Cynipini		quercuscorticis	(Linnaeus, 1761, Cynips) -a-		England, Scotland, Wales, Ireland, Isle of Man	Cynips
129	syn	species	Cynipidae		CYNIPINI		corticis	(Hartig, 1840, Cynips) unjustified emendation -a-
130	syn	species	Cynipidae		CYNIPINI		brevicornis	(Hartig, 1841, Neuroterus) -s-
131	syn	species	Cynipidae		CYNIPINI		gemmatus	Adler, 1881 -s-
132	syn	species	Cynipidae		CYNIPINI		krajnovici	Tavares, 1901 -a-
133	valid	species	Cynipidae		Cynipini		quercusradicis	(Fabricius, 1798, Cynips) -a-		England, Scotland, Wales, Ireland	Cynips
134	syn	species	Cynipidae		CYNIPINI		noduli	Hartig, 1840 -s-
135	syn	species	Cynipidae		CYNIPINI		trilineatus	Hartig, 1840 -s-
136	syn	species	Cynipidae		CYNIPINI		parasiticus	(Hartig, 1841, Neuroterus) -s-
137	syn	species	Cynipidae		CYNIPINI		radicis	Hartig, 1841 -a-
138	syn	species	Cynipidae		CYNIPINI		rugiscuta	Thomson, 1877 -s-
139	valid	species	Cynipidae		Cynipini		quercusramuli	(Linnaeus, 1761, Cynips) -s-		England, Scotland, Wales, Ireland	Cynips
140	syn	species	Cynipidae		CYNIPINI		autumnalis	(Hartig, 1840, Cynips) -a-
141	syn	species	Cynipidae		CYNIPINI		amentorum	(Hartig, 1843, Teras) -s-
142	syn	species	Cynipidae		CYNIPINI		ramuli	Schenck, 1863 unjustified emendation -s-
143	valid	species	Cynipidae		Cynipini		rhyzomae	(Hartig, 1843, Cynips) -a-	Gall recorded by Bagnall & Harrison (1918) and Burkill (1933). Modern UK status uncertain. Galls of the sexual generation uncofirrmed in Britain. See also under testaceipes.	England, Wales	Cynips
144	syn	species	Cynipidae		CYNIPINI		ionescui	Kierych, 1965 -a-
145	valid	species	Cynipidae		Cynipini		seminationis	(Giraud, 1859, Cynips) -a-	No sexual generation known.	England, Scotland, Wales	Cynips
146	syn	species	Cynipidae		CYNIPINI		inflorescentiae	(Schlechtendal, 1870, Cynips) -?-
147	valid	species	Cynipidae		Cynipini		sieboldi	(Hartig, 1843, Cynips) -a-			Cynips
148	syn	species	Cynipidae		CYNIPINI		corticalis	(Hartig, 1840, Cynips) -a-
149	syn	species	Cynipidae		CYNIPINI		quercuscorticis	(Bechstein & Scharfenberg, 1805 Cynips) preocc. -a-
150	syn	species	Cynipidae		CYNIPINI		occidentalis	Folliot, 1964 -s-
151	syn	species	Cynipidae		CYNIPINI		sieboldi forma poissoni	Folliot, 1964 -s-	Sexual generation, produced experimentally.
152	valid	species	Cynipidae		Cynipini		singularis	Mayr, 1870 -s-	added by Jennings (2014)	England
153	syn	species	Cynipidae		CYNIPINI		singulus	Mayr, 1870 -s-
154	valid	species	Cynipidae		Cynipini		solitarius	(Boyer de Fonscolombe, 1832, Diplolepis) -a-		England, Scotland, Wales, Ireland	Diplolepis
155	syn	species	Cynipidae		Cynipini		ferruginea	(Hartig, 1840, Cynips) -a-
156	syn	species	Cynipidae		Cynipini		occultus	Tschek, 1871 -s-
157	syn	species	Cynipidae		Cynipini		gallaepyriformis	(Olivier, 1791, Diplolepis) -a-
158	syn	species	Cynipidae		Cynipini		filigranata	(Dettmer, 1925, Oncaspis) -s-
159	syn	species	Cynipidae		Cynipini		villarrubiae	Tavares, 1930 -a-
160	valid	genus	Cynipidae		Cynipini	Aphelonyx		Mayr, 1881
161	valid	species	Cynipidae		Cynipini		cerricola	(Giraud, 1859, Cynips) -a-	added by Crawley (1997).	England	Cynips
162	valid	genus	Cynipidae		Cynipini	Biorhiza		Westwood, 1840
163	syn	genus	Cynipidae		CYNIPINI	APOPHYLLUS		Hartig, 1840
164	syn	genus	Cynipidae		CYNIPINI	TERAS		Hartig, 1840 preocc.
165	syn	genus	Cynipidae		CYNIPINI	PHILONIPS		Walsh, 1864
166	syn	genus	Cynipidae		CYNIPINI	HETEROBIUS		Guérin-Méneville, 1865
167	syn	genus	Cynipidae		CYNIPINI	DRYOTERAS		Förster, 1869
168	syn	genus	Cynipidae		CYNIPINI	HARTIGIA		Rondani, 1871 preocc.
169	valid	species	Cynipidae		Cynipini		pallida	(Olivier, 1791, Diplolepis) -s-		England, Scotland, Wales, Ireland, Isle of Man	Diplolepis	pallidus
170	syn	species	Cynipidae		CYNIPINI		aptera	(Bosc, 1791, Cynips) preocc. -a-
171	syn	species	Cynipidae		CYNIPINI		gallaealveariformis	(D’Anthoine, 1794, Diplolepis) -s-
172	syn	species	Cynipidae		CYNIPINI		gallaeacerebriformis	(D’Anthoine, 1794, Diplolepis) -s-
173	syn	species	Cynipidae		CYNIPINI		quercusterminalis	(Fabricius, 1798, Cynips) -s-
174	syn	species	Cynipidae		CYNIPINI		terminalis	(Hartig, 1840, Teras) unjustified emendation -s-
175	syn	species	Cynipidae		CYNIPINI		sieboldi	(Stadelman, 1892, Andricus) (non Hartig, 1843) -a-
176	valid	genus	Cynipidae		Cynipini	Callirhytis		Förster, 1869	Species of Callirhytis removed from the British and Irish list: [glandium (Giraud, 1859, Andricus) -a-, syn. rufescens (Mayr, 1882)] - Recorded by Rolfe (1881) and Askew (1959) but in error fide Eady & Quinlan (1963).
177	syn	genus	Cynipidae		CYNIPINI	EUSYMPHAGUS		Dettmer, 1930
178	valid	species	Cynipidae		Cynipini		bella	(Dettmer, 1930, Eusymphagus) -s-		England, Wales, Ireland	Eusymphagus	belllus
179	valid	species	Cynipidae		Cynipini		erythrocephala	(Giraud, 1859, Andricus) -a-		England, Wales	Andricus
180	syn	species	Cynipidae		CYNIPINI		?erythrosoma	Dettmer, 1933 -a-
181	syn	species	Cynipidae		CYNIPINI		erythrostoma	Dettmer, 1933 -a-
182	syn	species	Cynipidae		CYNIPINI		hartigi	Förster, 1869 -s-	Callirhytis hartigi Förster, 1869 established as the sexual generation by Pujade-Villar et al. (2007), who produce evidence that erythrosoma may be a separate species.
183	valid	genus	Cynipidae		Cynipini	Cynips		Linnaeus, 1758	Species of Cynips excluded from the British and Irish list: [quercus (Fourcroy, 1785, Diplolepis) -a-, syn. pubescentis (Mayr, 1881, Dryophanta) -s-] - Both generations reported by Bagnall & Harrison (1918, 1919) from several localities in Northumberland and Tyne & Wear, perhaps in error due to confusion with the similar quercusfolii. There are no subsequent records and the species requires confi…
184	syn	genus	Cynipidae		CYNIPINI	DIPLOLEPIS		misapplied
185	syn	genus	Cynipidae		CYNIPINI	DRYOPHANTA		Förster, 1869
186	valid	species	Cynipidae		Cynipini		agama	Hartig, 1840 -a-	The sexual generation has been described as ‘forma mailleti Folliot, 1964’.	England, Scotland, Wales, Ireland
187	syn	genus	Cynipidae		CYNIPINI		f.mailleti	Folliot, 1964 -s-
188	valid	species	Cynipidae		Cynipini		disticha	Hartig, 1840 -a-		England, Scotland, Wales, Ireland
189	syn	species	Cynipidae		CYNIPINI		f. indistincta	Niblett, 1948 -s-
190	valid	species	Cynipidae		Cynipini		divisa	Hartig, 1840 -a-		England, Scotland, Wales, Ireland
191	syn	species	Cynipidae		CYNIPINI		verrucosus	(Schlechtendal, 1870, Spathegaster) -s-
192	valid	species	Cynipidae		Cynipini		longiventris	Hartig, 1840 -a-		England, Scotland, Wales, Ireland
193	syn	species	Cynipidae		CYNIPINI		similis	(Adler, 1881, Spathegaster) -s-
194	syn	species	Cynipidae		CYNIPINI		f. substituta	Kinsey, 1930 -s-
195	valid	species	Cynipidae		Cynipini		quercusfolii	Linnaeus, 1758 -a-	Galls of the sexual generation were recorded from Durham and Northumberland as flosculi by Bagnall & Harrison (1918); there appear to be no further records.	England, Scotland, Wales, Ireland
196	syn	species	Cynipidae		CYNIPINI		floriiquercus	Gleditsch, 1774 -a-
197	syn	species	Cynipidae		CYNIPINI		scutellaris	(Olivier, 1811, Diplolepis) -a-
198	syn	species	Cynipidae		CYNIPINI		gallaecerasiformis	D’Anthoine, 1794 -a-
199	syn	species	Cynipidae		CYNIPINI		gallaeunedoniformis	(D’Anthoine, 1794, Diplolepis) -a-
200	syn	species	Cynipidae		CYNIPINI		giraudi	(Tschek, 1869, Spathegaster) -s-
201	syn	species	Cynipidae		CYNIPINI		taschenbergi	(Schlechtendal, 1870, Spathegaster) -s-
202	syn	species	Cynipidae		CYNIPINI		flosculi	(Giraud, 1868, Spathegaster) -s-
203	valid	genus	Cynipidae		Cynipini	Dryocosmus		Giraud, 1859	Species of Dryocosmus removed from the British and Irish list: [cerriphilus Giraud, 1859 -a-] - Galls recorded once by Fitch (1874); no further UK records.
204	valid	species	Cynipidae		Cynipini		#kuriphilus	Yasumatsu, 1951	Added by Malumphy (2015); EPPO (2015). This highly invasive, East Asian species has spread across Europe and has recently been reported from Kent. As the UK has Protected Zone Status for this global pest, apparently successful attempts were made to eradicate D.kuriphilus at the two outbreak sites and it should not be formally added to the British list at this stage.	England
205	valid	genus	Cynipidae		Cynipini	Neuroterus		Hartig, 1840	Species of Neuroterus removed from the British and Irish list: [punctatus (Bignell, 1892, Spathegaster)] - Added by Bignell (1892), no subsequent records, perhaps a misidentification..
206	syn	genus	Cynipidae		CYNIPINI	SPATHEGASTER		Hartig, 1840
207	syn	genus	Cynipidae		CYNIPINI	AMERISTUS		Förster, 1869
208	syn	genus	Cynipidae		CYNIPINI	DOLICHOSTROPHUS		Ashmead, 1887
209	syn	genus	Cynipidae		CYNIPINI	NEOSPATHEGASTER		Kinsey, 1923
210	syn	genus	Cynipidae		CYNIPINI	DIPLOBIUS		Kinsey, 1923
211	syn	genus	Cynipidae		CYNIPINI	NEONEUROTERUS		Monzen, 1954
212	syn	genus	Cynipidae		CYNIPINI	REPENTINIA		Belizin & Maisuradze, 1961
213	valid	species	Cynipidae		Cynipini		albipes	(Schenck, 1863, Spathegaster) -s-	Form ‘borealis’ described by Entwistle & Hails (1997).	England, Scotland, Wales, Ireland, Isle of Man	Spathegaster
214	syn	species	Cynipidae		CYNIPINI		laeviusculus	Schenck, 1863 -a-
215	syn	species	Cynipidae		CYNIPINI		pezizaeformis	Schlechtendal, 1870 -a-
216	syn	species	Cynipidae		CYNIPINI		codinae	Tavares, 1928 -s-
217	valid	species	Cynipidae		Cynipini		anthracinus	(Curtis, 1838, Cynips) -a-	Transferred from Andricus by Pujade-Villar et al. (1998).	England, Scotland, Wales, Ireland	Cynips
218	syn	species	Cynipidae		CYNIPINI		flavipes	(Fonscolombe, 1832, Diplolepis) -a-
219	syn	species	Cynipidae		CYNIPINI		ostrea	(Hartig, 1840, Cynips) -a-
220	syn	species	Cynipidae		CYNIPINI		furunculus	Beyerinck, 1882 -s-
221	valid	species	Cynipidae		Cynipini		numismalis	(Geoffroy, 1785, Cynips) -a-		England, Scotland, Wales, Ireland	Cynips
222	syn	species	Cynipidae		CYNIPINI		numismatis	(Olivier, 1790, Cynips) -a-
223	syn	species	Cynipidae		CYNIPINI		defectus	Hartig, 1840 -a-
224	syn	species	Cynipidae		CYNIPINI		reaumuri	Hartig, 1840 -a-
225	syn	species	Cynipidae		CYNIPINI		quercustiarae	(Curtis, 1843, Cynips)
226	syn	species	Cynipidae		CYNIPINI		nigricornis	Schenck, 1863 -a-
227	syn	species	Cynipidae		CYNIPINI		vesicatrix	(Schlechtendal, 1870, Cynips) -s-
228	syn	species	Cynipidae		CYNIPINI		vesicator	Hieronymus, 1890 -s-
229	syn	species	Cynipidae		CYNIPINI		brunneus	Dettmer 1925 -s-
230	valid	species	Cynipidae		Cynipini		politus	Hartig, 1840 -s-		England, Scotland, Ireland
231	syn	species	Cynipidae		CYNIPINI		petioliventris	(Hartig, 1840, Spathegaster) -s-
232	syn	species	Cynipidae		CYNIPINI		bipunctatus	Hartig, 1841 -s-
233	syn	species	Cynipidae		CYNIPINI		nitens	Hartig, 1841 -a-
234	syn	species	Cynipidae		CYNIPINI		rubeculus	Hartig, 1841 -a-
235	syn	species	Cynipidae		CYNIPINI		aprilinus	(Giraud, 1859, Spathegaster) -s-
236	syn	species	Cynipidae		CYNIPINI		schlechtendali	Mayr, 1870 -a-
237	valid	species	Cynipidae		Cynipini		quercusbaccarum	(Linnaeus, 1758, Cynips) -s-		England, Scotland, Wales, Ireland, Isle of Man	Cynips
238	syn	species	Cynipidae		CYNIPINI		quercuspedunculi	(Linnaeus, 1758, Cynips) -s-
239	syn	species	Cynipidae		CYNIPINI		baccarumquercus	(Fourcroy, 1785, Cynips) -s-
240	syn	species	Cynipidae		CYNIPINI		pedunculiquercus	(Fourcroy, 1785, Cynips) -s-
241	syn	species	Cynipidae		CYNIPINI		lenticularis	(Olivier, 1791, Diplolepis) -a-
242	syn	species	Cynipidae		CYNIPINI		longipennis	(Fabricius, 1793, Cynips) -a-
243	syn	species	Cynipidae		CYNIPINI		gallaelenticulae	(D’Anthoine, 1794, Diplolepis) -a-
244	syn	species	Cynipidae		CYNIPINI		gallaepisiformis	(D’Anthoine, 1794, Diplolepis) -s-
245	syn	species	Cynipidae		CYNIPINI		malpighii	Hartig, 1840 -a-
246	syn	species	Cynipidae		CYNIPINI		interruptrix	(Hartig, 1840, Cynips) -s-
247	syn	species	Cynipidae		CYNIPINI		interruptor	(Hartig, 1841, Spathegaster) -s-
248	syn	species	Cynipidae		CYNIPINI		baccarum	(Blanchard, 1849, Cynips) -s-
249	syn	species	Cynipidae		CYNIPINI		pedunculi	(Duméril, 1860, Diplolepis) -s-
250	syn	species	Cynipidae		CYNIPINI		attenuatus	Schenck, 1863 -a-
251	syn	species	Cynipidae		CYNIPINI		striatus	Schenck, 1863 -a-
252	syn	species	Cynipidae		CYNIPINI		pseudodisticha	(Küstenmacher, 1894, Dryophanta) -s-
253	valid	species	Cynipidae		Cynipini		tricolor	(Hartig, 1841, Spathegaster) -s-		England, Scotland, Wales, Ireland	Spathegaster
254	syn	species	Cynipidae		CYNIPINI		fumipennis	Hartig, 1841 -a-
255	syn	species	Cynipidae		CYNIPINI		varius	(Schenck, 1863, Spathegaster) -a-
256	valid	genus	Cynipidae		Cynipini	Plagiotrochus		Mayr, 1881
257	syn	genus	Cynipidae		CYNIPINI	FIORIA		Kieffer, 1903
258	syn	genus	Cynipidae		CYNIPINI	FIORIELLA		Kiefer, 1903
259	valid	species	Cynipidae		Cynipini		# australis	(Mayr, 1882, Dryocosmus) -a-	added by Robbins (2007), based on old agamic gall only.	Wales	Dryocosmus
260	valid	species	Cynipidae		Cynipini		coriaceus	(Mayr, 1882, Andricus) -a-	added by Robbins (2007), based on old agamic gall only.	Wales	Andricus
261	syn	genus	Cynipidae		CYNIPINI		pseudococcus	(Kieffer, 1902, Andricus) -a-
262	valid	species	Cynipidae		Cynipini		quercusilicis	(Fabricius, 1798, Cynips) -s-	Added from sexual generation gall, adults reared (Hancy & Hancy, 2004). Recent records from Devon, Cornwall and Hampshire (Isle of Wight). Catkin galls reported by Biggs (2011) from Isle of Wight as forma fusifex, which has no taxonomic status.	England	Cynips
263	syn	species	Cynipidae		CYNIPINI		cocciferae	(Lichtenstein, 1877, Andricus) -s-
264	syn	species	Cynipidae		CYNIPINI		ilicis	(Lichtenstein, 1877, Andricus) -s-
265	syn	species	Cynipidae		CYNIPINI		emeryi	Mayr, 1882 -s-
266	syn	species	Cynipidae		CYNIPINI		fusifex	Mayr, 1882 -s-
267	valid	genus	Cynipidae		Cynipini	Pseudoneuroterus		Kinsey, 1923
268	valid	species	Cynipidae		Cynipini		saliens	(Kollar, 1857, Cynips) -a-	added by Redfern (2006).	England	Cynips
269	syn	species	Cynipidae		CYNIPINI		saltans	(Giraud, 1859, Neuroterus) -a-
270	syn	species	Cynipidae		CYNIPINI		glandiformis	(Giraud, 1859, Spathegaster) -s-
271	valid	genus	Cynipidae		Cynipini	Trigonaspis		Hartig, 1840	Species of Trigonaspis removed from the British and Irish list: [synaspis (Hartig, 1841, Apophyllus) -a-, syn. megapteropsis Wriese, 1900 -s-] - Recorded by Bagnall & Harrison (1918) from the agamic gall; no further records.
272	syn	genus	Cynipidae		CYNIPINI	XANTHOTERAS		Ashmead, 1897
273	syn	genus	Cynipidae		CYNIPINI	BELIZINELLA		Kovatev, 1965
274	syn	genus	Cynipidae		CYNIPINI	USSURASPIS		Kovalev, 1965
275	valid	species	Cynipidae		Cynipini		megaptera	(Panzer, 1801, Cynips) -s-		England, Scotland, Wales, Ireland
276	syn	species	Cynipidae		CYNIPINI		crustalis	Hartig, 1840 -s-
277	syn	species	Cynipidae		CYNIPINI		renum	(Hartig, 1840, Cynips) -a-
278	valid	tribe	Cynipidae		Diastrophini			Nieves-Aldrey, Nylander & Ronquist, 2015
279	valid	genus	Cynipidae		Diastrophini	Diastrophus		Hartig, 1840	Species of Diastrophus removed from the British and Irish list: [mayri Reinhard, 1876] - The status of mayri as a British species appears to rest solely on three published references to the species: Cameron (1893), subsequently quoted in Connold (1909) and repeated by Swanton (1912). Nowhere does Cameron claim to have evidence of this species’ occurrence in Britain, merely comparing its gall to o…
280	valid	species	Cynipidae		Diastrophini		rubi	(Bouché, 1834, Cynips)		England, Wales, Ireland	Cynips
281	syn	species	Cynipidae		DIASTROPHINI		aphidivorus	Cameron, 1889
282	syn	species	Cynipidae		DIASTROPHINI		hartigi	(Marshall, 1868, Andricus)
283	valid	genus	Cynipidae		Diastrophini	Periclistus		Förster, 1869
284	valid	species	Cynipidae		Diastrophini		brandtii	(Ratzeburg, 1831, Cynips)		England, Scotland, Wales	Cynips
285	valid	species	Cynipidae		Diastrophini		caninae	(Hartig, 1840, Aylax)		England, Scotland, Ireland	Aylax
286	syn	species	Cynipidae		DIASTROPHINI		germanus	(Schenck, 1863, Aulax)
287	syn	species	Cynipidae		DIASTROPHINI		rosarum	Dettmer, 1925
288	valid	species	Cynipidae		Diastrophini		?spinosissimae	Dettmer, 1924	Close to caninae, taxonomic status needs revision (note in Fauna Europaea).	England, Scotland, Wales, Ireland
289	valid	genus	Cynipidae		Diastrophini	Xestophanes		Förster, 1869
290	valid	species	Cynipidae		Diastrophini		brevitarsis	(Thomson, 1877, Aulax)		England, Scotland, Wales, Ireland	Aulax
291	syn	species	Cynipidae		DIASTROPHINI		tormentillae	Schlechtendal, 1880
292	valid	species	Cynipidae		Diastrophini		potentillae	(Retzius, 1783, Cynips)		England, Wales, Ireland, Isle of Man	Cynips
293	syn	species	Cynipidae		DIASTROPHINI		brevicornis	(Curtis, 1838, Cynips) preocc.
294	syn	species	Cynipidae		DIASTROPHINI		splendens	(Hartig, 1840, Aylax)
295	syn	species	Cynipidae		DIASTROPHINI		laevigata	Schenck, 1863
296	syn	species	Cynipidae		DIASTROPHINI		abbreviatus	(Thomson, 1877, Aulax)
297	syn	species	Cynipidae		DIASTROPHINI		foveicollis	Thomson, 1877
298	valid	tribe	Cynipidae		PHANACIDINI			Nieves-Aldrey, Nylander & Ronquist, 2015
299	valid	genus	Cynipidae		Phanacidini	Phanacis		Förster, 1860
300	syn	genus	Cynipidae		PHANACIDINI	GILLETTEA		Ashmead, 1897
301	valid	species	Cynipidae		Phanacidini		caulicola	(Hedicke, 1939, Aylax)		England, Wales	Aylax
302	valid	species	Cynipidae		Phanacidini		centaureae	(Förster, 1860, Cynips)		England, Scotland	Cynips
303	syn	species	Cynipidae		PHANACIDINI		punctipleuris	(Thomson, 1877, Aulax)
304	syn	species	Cynipidae		PHANACIDINI		karadagica	Diakontschuk, 1980
305	syn	species	Cynipidae		PHANACIDINI		parvulus	Diakontschuk, 1980
306	valid	species	Cynipidae		Phanacidini		hypochoeridis	(Kieffer, 1887, Aulax)		England, Wales, Ireland, Isle of Man	Aulax
307	syn	species	Cynipidae		PHANACIDINI		seriolae	Stefani, 1903
308	valid	species	Cynipidae		Phanacidini		?taraxaci	(Ashmead, 1897, Gillettea)	Galls recorded from Co. Durham (Bagnall, 1917), Derbyshire (Fordham, 1917) and Scotland (Bagnall, 1932). No recent records.	England, Scotland	Gillettea
309	valid	genus	Cynipidae		Phanacidini	Timaspis		Mayr, 1881	Synonymised with Phanacis (Eady & Quinlan, 1963); re-established by Nieves-Aldrey (1994) but Melika (2006) again treated Timaspis as a synonym of Phanacis. Species of Timaspis removed from the British and Irish list: [sonchi (De Stefani, 1900, Aulax)] - Galls recorded from Norfolk by Bagnall & Burkill (1935) but no recent records. Possibly confused in the literature with Aulacidea follioti which …
310	valid	species	Cynipidae		Phanacidini		?lampsanae	(Perris, 1873, Aulax)	Galls recorded in Norfolk and Derbyshire by Bagnall & Harrison (1934).	England	Aulax
311	valid	species	Cynipidae		Phanacidini		lusitanica	Tavares, 1904	added by Jennings (2005).	England
312	valid	tribe	Cynipidae		DIPLOLEPIDINI			Latreille, 1802
313	syn	tribe	Cynipidae		RHODITINI			Hartig, 1840	synonymy by Ronquist (1999).
314	valid	genus	Cynipidae		Diplolepidini	Diplolepis		Geoffroy, 1762
315	syn	genus	Cynipidae		DIPLOLEPIDINI	RHODITES		Hartig, 1840
316	syn	genus	Cynipidae		DIPLOLEPIDINI	HOLOLEXIS		Förster, 1869
317	syn	genus	Cynipidae		DIPLOLEPIDINI	TRIBALIA		Walsh, 1864
318	syn	genus	Cynipidae		DIPLOLEPIDINI	LYTORHODITES		Kieffer, 1902
319	syn	genus	Cynipidae		DIPLOLEPIDINI	NIPPORHODITES		Sakugami, 1949
320	valid	species	Cynipidae		Diplolepidini		eglanteriae	(Hartig, 1840, Rhodites)	Galls not distinguishable from those of the smooth form of nervosa; records from Scotland, Wales and the Isle of Man are based on galls only.	England	Rhodites
321	syn	species	Cynipidae		DIPLOLEPIDINI		rufipes	(Förster, 1869, Hololexis)
322	valid	species	Cynipidae		Diplolepidini		mayri	(Schlechtendal, 1877, Rhodites)		England	Rhodites
323	syn	species	Cynipidae		DIPLOLEPIDINI		orthospinae	(Beijerinck, 1883, Rhodites)
324	valid	species	Cynipidae		Diplolepidini		nervosa	(Curtis, 1838, Cynips)		England, Wales	Cynips
325	syn	species	Cynipidae		DIPLOLEPIDINI		centifoliae	(Hartig, 1840, Rhodites)	synonymy by Pujade-Villar & Plantard (2002).
326	syn	species	Cynipidae		DIPLOLEPIDINI		rosarum	(Giraud, 1859, Rhodites)
327	syn	species	Cynipidae		DIPLOLEPIDINI		andrei	(Kieffer, 1904, Rhodites)
328	syn	species	Cynipidae		DIPLOLEPIDINI		kiefferi	(Loiselle, 1912, Rhodites)
329	syn	species	Cynipidae		DIPLOLEPIDINI		dispar	(Niblett, 1943, Rhodites)
330	valid	species	Cynipidae		Diplolepidini		rosae	(Linnaeus, 1758, Cynips)		England, Scotland, Wales, Ireland, Isle of Man	Cynips
331	syn	species	Cynipidae		DIPLOLEPIDINI		bedeguaris	Fourcroy, 1785
332	valid	species	Cynipidae		Diplolepidini		spinosissimae	(Giraud, 1859, Rhodites)		England, Scotland, Wales, Ireland, Isle of Man	Rhodites
333	syn	species	Cynipidae		DIPLOLEPIDINI		rosae-spinosissimae	(Inchbald, 1861, Cynips)
334	valid	tribe	Cynipidae		Synergini			Ashmead, 1896	Taxonomy follows Pujade-Villar et al. (2003).
335	valid	genus	Cynipidae		Synergini	Saphonecrus		Dalla Torre & Kieffer, 1910
336	valid	species	Cynipidae		Synergini		connatus	(Hartig, 1840, Synergus)		England, Scotland, Ireland	Synergus
337	syn	species	Cynipidae		SYNERGINI		erythroneurus	(Hartig, 1840, Synergus)
338	valid	genus	Cynipidae		Synergini	Synergus		Hartig, 1840	Species of Synergus removed from the British and Irish list: [hayneanus (Ratzeberg, 1833, Cynips)]. Added by Morley (1931); specimen in his collection at Ipswich Museum redetermined as umbraculus (Eady, 1952).
339	syn	genus	Cynipidae		SYNERGINI	SAPHOLYTUS		Förster, 1869
340	valid	species	Cynipidae		Synergini		apicalis	Hartig, 1841		England, Scotland
341	valid	species	Cynipidae		Synergini		clandestinus	Eady, 1952		England, Wales, Ireland
342	valid	species	Cynipidae		Synergini		consobrinus	Giraud, 1911	Added by Jennings (2017); identified by G. Melika	England
343	valid	species	Cynipidae		Synergini		crassicornis	(Curtis, 1838, Cynips)	close to caninae, taxonomic status needs revision.	England, Wales, Ireland	Cynips
344	syn	species	Cynipidae		SYNERGINI		evanescens	Mayr, 1872
345	syn	species	Cynipidae		SYNERGINI		fidelis	Tavares, 1920
346	syn	species	Cynipidae		SYNERGINI		carinulatus	Dettmer, 1924
347	valid	species	Cynipidae		Synergini		facialis	Hartig, 1840	This species has hitherto been known as S. gallaepomiformis in Britain but it was shown in Pujade-Villar (2005) that this name refers to another species (of Saphonecrus) and the widespread species should be called facialis. Melika (2006) proposed that gallaepomiformis (Boyer de Fonscolombe, 1832, Diplolepis) should be retained as the valid name but did not make an application to ICZN to overturn …	England, Scotland, Wales, Ireland	Diplolepis
348	syn	species	Cynipidae		SYNERGINI		gallaepomiformis	misident.
349	valid	species	Cynipidae		Synergini		incrassatus	Hartig, 1840		England, Scotland, Wales, Ireland
350	syn	species	Cynipidae		SYNERGINI		bipunctatus	Hartig, 1841
351	syn	species	Cynipidae		SYNERGINI		crassicornis	Hartig, 1843 preocc.
352	valid	species	Cynipidae		Synergini		pallicornis	Hartig, 1841		England, Wales, Ireland
353	syn	species	Cynipidae		SYNERGINI		pallidicornis	Dalla Torre, 1893
354	valid	species	Cynipidae		Synergini		pallidipennis	Mayr, 1872		England, Wales
355	valid	species	Cynipidae		Synergini		pallipes	Hartig, 1840		England, Wales, Ireland
356	syn	species	Cynipidae		SYNERGINI		flavicornis	Hartig, 1840
357	syn	species	Cynipidae		SYNERGINI		nervosus	Hartig, 1840
358	syn	species	Cynipidae		SYNERGINI		nigripes	Hartig, 1840
359	syn	species	Cynipidae		SYNERGINI		albipes	Hartig, 1841
360	syn	species	Cynipidae		SYNERGINI		erythrocerus	Hartig, 1841
361	syn	species	Cynipidae		SYNERGINI		variolosus	Hartig, 1841
362	syn	species	Cynipidae		SYNERGINI		varius	Hartig, 1841
363	syn	species	Cynipidae		SYNERGINI		xanthocerus	Hartig, 1841
364	syn	species	Cynipidae		SYNERGINI		tscheki	Mayr, 1872
365	syn	species	Cynipidae		SYNERGINI		tristis	Mayr, 1873
366	syn	species	Cynipidae		SYNERGINI		hartigi	Giraud, 1911
367	syn	species	Cynipidae		SYNERGINI		fulvipes	Dettmer, 1924
368	syn	species	Cynipidae		SYNERGINI		mutabilis	Dettmer, 1924
369	valid	species	Cynipidae		Synergini		radiatus	Mayr, 1872		England
370	valid	species	Cynipidae		Synergini		reinhardi	Mayr, 1872		England, Scotland, Wales, Ireland
371	valid	species	Cynipidae		Synergini		ruficornis	Hartig, 1840		England, Ireland
372	valid	species	Cynipidae		Synergini		thaumacerus	(Dalman, 1823, Cynips)		England	Cynips	thaumacera
373	syn	species	Cynipidae		SYNERGINI		klugii	Hartig,1840
374	syn	species	Cynipidae		SYNERGINI		carinatus	Hartig, 1841
375	syn	species	Cynipidae		SYNERGINI		testaceus	(Hartig, 1841, Xystus)
376	syn	species	Cynipidae		SYNERGINI		thaumatocerus	Dalla Torre, 1893 (unjustified emendation)
377	syn	species	Cynipidae		SYNERGINI		inflatus	Giraud, 1911
378	syn	species	Cynipidae		SYNERGINI		vesiculosus	Giraud, 1911
379	syn	species	Cynipidae		SYNERGINI		inflatus	Dettmer, 1924 preocc.
380	valid	species	Cynipidae		Synergini		tibialis	Hartig, 1840
381	syn	species	Cynipidae		SYNERGINI		erythrostomus	Hartig, 1841
382	syn	species	Cynipidae		SYNERGINI		immarginatus	Hartig, 1841
383	syn	species	Cynipidae		SYNERGINI		rotundiventris	Mayr, 1872
384	valid	species	Cynipidae		Synergini		umbraculus	(Olivier, 1791, Diplolepis)		England, Scotland, Wales, Ireland	Diplolepis
385	syn	species	Cynipidae		SYNERGINI		gallaeumbraculatae	(D’Anthoine, 1794, Diplolepis)
386	syn	species	Cynipidae		SYNERGINI		rufipes	(Boyer de Fonscolombe, 1832, Diplolepis)
387	syn	species	Cynipidae		SYNERGINI		orientalis	Hartig, 1841
388	syn	species	Cynipidae		SYNERGINI		melanopus	Hartig, 1843
389	syn	species	Cynipidae		SYNERGINI		socialis	Hartig, 1843
390	syn	species	Cynipidae		SYNERGINI		punctatus	Dettmer, 1924 preocc.
391	valid	species	Cynipidae		Synergini		variabilis	Mayr, 1872	added by Chinery & Williams in Melika (2006)	England
392	syn	species	Cynipidae		SYNERGINI		cerridis	Giraud, 1911
393	syn	species	Cynipidae		SYNERGINI		conformis	Giraud, 1911
394	syn	species	Cynipidae		SYNERGINI		cerricolus	Vassileva-Samnalieva, 1986
395	valid	Family	Figitidae					Hartig, 1840[49]	Some Irish records from O’Connor et al. (2003).
396	syn	Subfamily	Figitidae	Anacharitinae				Thomson, 1862
397	syn	Subfamily	Figitidae	MEGAPELMINAE				Förster, 1869
398	syn	Subfamily	Figitidae	ACANTHAEGILIPINAE				Kovalev, 1979	synonymy by Ronquist (1999).
399	syn	Subfamily	Figitidae	PROANACHARITINAE				Kovalev, 1979	synonymy by Ronquist (1999).
400	valid	genus	Figitidae	Anacharitinae		Aegilips		Haliday in Walker, 1835
401	valid	species	Figitidae	Anacharitinae			atricornis	Fergusson, 1985	added by Fergusson (1985)	England, Ireland
402	valid	species	Figitidae	Anacharitinae			nitidula	(Dalman, 1823, Cynips)		England, Ireland, Isle of Man	Cynips
403	syn	species	Figitidae	Anacharitinae			fumipennis	(Westwood, 1833, Anacharis)
404	syn	species	Figitidae	Anacharitinae			rufipes	(Westwood, 1833, Anacharis)
405	syn	species	Figitidae	Anacharitinae			dalmani	Reinhard, 1860
406	syn	species	Figitidae	Anacharitinae			rugicollis	Reinhard, 1860
407	syn	species	Figitidae	Anacharitinae			ruficornis	Cameron, 1883
408	syn	species	Figitidae	Anacharitinae			striolata	Cameron, 1883
409	syn	species	Figitidae	Anacharitinae			bicolorata	Cameron, 1887
410	valid	species	Figitidae	Anacharitinae			romseyensis	Fergusson, 1985	added by Fergusson (1985)	England
411	valid	species	Figitidae	Anacharitinae			vena	Fergusson, 1985	added by Fergusson (1985)	England, Scotland
412	valid	genus	Figitidae	Anacharitinae		Anacharis		Dalman, 1823	Synonymy follows Fergusson (1986).
413	syn	genus	Figitidae	Anacharitinae		MEGAPELMUS		Hartig, 1840
414	syn	genus	Figitidae	Anacharitinae		SYNAPSIS		Förster, 1869 preocc.
415	syn	genus	Figitidae	Anacharitinae		PROSYNAPSIS		Dalle Torre & Kieffer, 1910
416	valid	species	Figitidae	Anacharitinae			eucharoides	(Dalman, 1818, Cynips)		England, Ireland	Cynips
417	syn	species	Figitidae	Anacharitinae			tinctus	Walker, 1835
418	syn	species	Figitidae	Anacharitinae			typica	Walker, 1835
419	syn	species	Figitidae	Anacharitinae			petiolata	(Zetterstedt, 1838, Cynips)
420	syn	species	Figitidae	Anacharitinae			spheciformis	(Hartig, 1840, Megapelmus)
421	syn	species	Figitidae	Anacharitinae			eucharioides	misspelling
422	valid	species	Figitidae	Anacharitinae			immunis	Walker, 1835		England, Ireland
423	syn	species	Figitidae	Anacharitinae			ensifer	Walker, 1835
424	syn	species	Figitidae	Anacharitinae			rufiventris	(Hartig, 1841, Megapelmus)
425	syn	species	Figitidae	Anacharitinae			staegeri	Dahlbom, 1842
426	syn	species	Figitidae	Anacharitinae			aquisgranensis	(Förster, 1869, Synapsis)
427	valid	genus	Figitidae	Anacharitinae		Xyalaspis		Hartig, 1843	Western Palaearctic species were revised by Mata-Casanova et al. (2015).
428	syn	genus	Figitidae	Anacharitinae		CONASPICERA		Hedicke, 1914
429	valid	species	Figitidae	Anacharitinae			armata	(Giraud, 1860, Aegilips)		England, Scotland, Ireland	Aegilips	armatus
430	syn	species	Figitidae	Anacharitinae			abietina	(Giraud, 1860, Aegilips)
431	syn	species	Figitidae	Anacharitinae			scotica	(Cameron, 1883, Aegilips)
432	valid	species	Figitidae	Anacharitinae			petiolata	Kieffer, 1901		England, Scotland, Ireland
433	syn	species	Figitidae	Anacharitinae			subulifera	misident.
434	valid	Subfamily	Figitidae	Aspicerinae				Dalla Torre & Kieffer, 1910
435	syn	Subfamily	Figitidae	Onychiinae				Thomson, 1862
436	valid	genus	Figitidae	Aspicerinae		Aspicera		Dahlbom, 1842
437	syn	genus	Figitidae	Aspicerinae		Onychia		Haliday in Curtis, 1829 preocc.
438	syn	genus	Figitidae	Aspicerinae		Bellona		Giraud, 1860
439	valid	species	Figitidae	Aspicerinae			scutellata	(Villers, 1789, Tenthredo)	After the taxonomic changes in the revision by Ros-Farré & Pujade-Villar (2013) it is not entirely certain which nominal species is present in the British material. The authors cite scutellata as British, but with a reference to Fergusson (1986), thus not based on reexamination of specimens.	Ireland	Tenthredo
440	syn	species	Figitidae	Aspicerinae			ediogaster	(Rossi, 1790, Evania)
441	syn	species	Figitidae	Aspicerinae			bicolor	(Fonscolombe, 1832, Figites)
442	syn	species	Figitidae	Aspicerinae			aculeator	(Fonscolombe, 1832, Figites)
443	syn	species	Figitidae	Aspicerinae			ruficollis	Kieffer, 1907 (Aspicera scutellata var.)
444	valid	genus	Figitidae	Aspicerinae		Callaspidia		Dahlbom, 1842	Nomenclature follows Ros-Farré & Pujade-Villar (2009).
445	valid	species	Figitidae	Aspicerinae			defonscolombei	Dahlbom, 1842		England, Ireland
446	syn	species	Figitidae	Aspicerinae			westwoodi	Dahlbom, 1842
447	syn	species	Figitidae	Aspicerinae			nigripes	(Cameron, 1879, Onychia)
448	syn	species	Figitidae	Aspicerinae			dufouri	Giraud, 1860
449	syn	species	Figitidae	Aspicerinae			fonscolombei	Dahlbom, 1856 unjustified emendation
450	syn	species	Figitidae	Aspicerinae			provancheri	Ashmead, 1887	synonymy by Ros-Farré & Pujade-Villar (2009).
451	syn	species	Figitidae	Aspicerinae			striolata	(Cameron, 1888, Onychia)	synonymy by Ros-Farré & Pujade-Villar (2009).
452	syn	species	Figitidae	Aspicerinae			areolata	(Kieffer, 1901, Onychia)	synonymy by Ros-Farré & Pujade-Villar (2009).
453	syn	species	Figitidae	Aspicerinae			rubricus	Dettmer, 1924	synonymy by Ros-Farré & Pujade-Villar (2009).
454	syn	species	Figitidae	Aspicerinae			vitripennis	(Kieffer, 1901, Onychia dufouri var.)
455	syn	species	Figitidae	Aspicerinae			minima	(Kieffer, 1901, Onychia fonscolombei var.)
456	valid	genus	Figitidae	Aspicerinae		Melanips		Haliday in Walker, 1835	Transferred from Figitinae to Aspicerinae by Buffington et al. (2007). Synonymy follows Fergusson (1986).
457	syn	genus	Figitidae	Aspicerinae		SCYTODES		Hartig, 1840 preocc.
458	syn	genus	Figitidae	Aspicerinae		AMBLYNOTUS		Hartig, 1843
459	syn	genus	Figitidae	Aspicerinae		ANOLYTUS		Förster, 1869
460	valid	species	Figitidae	Aspicerinae			alienus	Giraud, 1860		England, Ireland
461	syn	species	Figitidae	Aspicerinae			opacus	misident.
462	syn	species	Figitidae	Aspicerinae			dalmanni	(Dahlbom, 1842, Figites) nom. nud.
463	syn	species	Figitidae	Aspicerinae			longitarsus	(Reinhard, 1860, Amblynotus)
464	valid	species	Figitidae	Aspicerinae			microcerus	(Kieffer, 1903, Amblynotus)		England, Ireland	Amblynotus
465	valid	species	Figitidae	Aspicerinae			opacus	(Hartig, 1840, Scytodes)		England, Ireland	Scytodes
466	syn	species	Figitidae	Aspicerinae			femoralis	Cameron, 1883
467	valid	species	Figitidae	Aspicerinae			sylvanus	Giraud, 1860		England, Scotland, Wales, Ireland
468	syn	species	Figitidae	Aspicerinae			rufipes	Förster, 1869
469	syn	species	Figitidae	Aspicerinae			biusta	(Cameron, 1879, Omalaspis)
470	valid	genus	Figitidae	Aspicerinae		Omalaspis		Giraud, 1860
471	syn	genus	Figitidae	Aspicerinae		TAVARESIA		Kieffer, 1901
472	syn	genus	Figitidae	Aspicerinae		LAMBERTONIA		Kieffer, 1901
473	valid	species	Figitidae	Aspicerinae			carinata	(Kieffer, 1901, Tavaresia)		Wales	Tavaresia
474	valid	Subfamily	Figitidae	Charipinae				Dalla Torre & Kieffer, 1910	Except where noted, nomenclature follows Menke & Evenhuis (1991) and Ferrer-Suay et al. (2012a,b,c,d, 2013a,b,c,d, 2014a,b, 2015). Tribal subdivisions have been abandoned following Paretas-Martinez et al. (2007), who found that Alloxystini was paraphyletic with respect to Charipini. Some Welsh occurrence records from Baker (2013).
475	syn	Subfamily	Figitidae	ALLOTRIINAE				Thomson, 1862 unavailable		England
476	syn	Subfamily	Figitidae	ALLOXYSTINAE				Hellén, 1931
477	syn	subfamily	Figitidae	Dilytini				kierych, 1979
478	syn	Subfamily	Figitidae	LYTOXYSTINAE				Kovalev, 1994	synonymy by Ronquist (1999)
479	valid	genus	Figitidae	Charipinae		Alloxysta		Förster, 1869	Quinlan (1978a) listed 36 species for Britain and Ireland, which Fergusson (1986) reduced to 11, mainly through synonymy. However, Fergusson did not work with much reared material and Evenhuis (1985) and Müller et al. (1999) have adopted much narrower species limits than Fergusson, an approach borne out by FVV’s work on the biology and taxonomy of the genus (see Van Veen et al., 2003). Species of…
480	syn	genus	Figitidae	Charipinae		ALLOTRIA		Westwood, 1833 preocc.
481	syn	genus	Figitidae	Charipinae		XYSTUS		Hartig, 1840 preocc.
482	syn	genus	Figitidae	Charipinae		PEZOPHYCTA		Förster, 1869
483	syn	species	Figitidae	Charipinae		NEPHYCTA		Förster, 1869
484	syn	genus	Figitidae	Charipinae		ADELIXYSTA		Kierych, 1988
485	syn	genus	Figitidae	Charipinae		CARVERCHARIPS		Kovalev, 1994
486	valid	species	Figitidae	Charipinae			abdera	Fergusson, 1986	added by Fergusson (1986)	England
487	valid	species	Figitidae	Charipinae			apteroidea	Hellén, 1963	det. Van Veen, added here. The species identified as brachyptera by Müller et al. (1999) is actually apteroidea, although the true brachyptera has also been found in Silwood Park.	England
488	valid	species	Figitidae	Charipinae			arcuata	(Kieffer, 1902, Allotria)	Raised from synonymy with brevis by Ferrer-Suay et al. (2012b).	Scotland, Wales	Allotria
489	syn	species	Figitidae	Charipinae			minuta	misident.
490	syn	species	Figitidae	Charipinae			ligustri	Evenhuis, 1976
491	valid	species	Figitidae	Charipinae			basimacula	(Cameron, 1886, Allotria)	Raised from synonymy with macrophadnus by Ferrer-Suay et al. (2013a).	Scotland	Allotria
492	syn	species	Figitidae	Charipinae			caledonica	(Cameron, 1886, Allotria)
493	syn	species	Figitidae	Charipinae			perplexa	(Cameron, 1889, Allotria)
494	valid	species	Figitidae	Charipinae			brachyptera	(Hartig, 1840, Xystus)		England, Scotland, Wales, Ireland	Xystus	brachypterus
495	valid	species	Figitidae	Charipinae			brevis	(Thomson, 1862, Allotria)		England	Allotria
496	syn	species	Figitidae	Charipinae			minuta	misident.
497	valid	species	Figitidae	Charipinae			castanea	(Hartig, 1841, Xystus)	Synonymised with fulviceps by Fergusson (1986) but treated as a valid species by Ferrer-Suay et al. (2012a) following the advice of FVV.	England, Wales	Xystus	castaneus
498	syn	species	Figitidae	Charipinae			melanogaster	misident.
499	syn	species	Figitidae	Charipinae			maculicollis	(Cameron, 1886, Allotria)
500	syn	species	Figitidae	Charipinae			ruficollis	(Cameron, 1883, Allotria)	Allotria ruficollis is listed as a synonym of fulviceps in Fauna Europaea, following alternate synonymisations under erythrothorax (Quinlan, 1974) and castanea (Evenhuis, 1982). In Müller et al. (1999) this was recorded as ‘Alloxysta f1’.
501	syn	species	Figitidae	Charipinae			ruficeps	(Cameron, 1883, Allotria) preocc.
502	syn	species	Figitidae	Charipinae			megaptera	(Cameron, 1889, Allotria)
503	syn	species	Figitidae	Charipinae			dubia	Kieffer, 1902 (Alloxysta erythrothorax var.)
504	syn	species	Figitidae	Charipinae			rubriceps	(Kieffer, 1902, Allotria)
505	syn	species	Figitidae	Charipinae			semiclausa	Kieffer, 1904
506	syn	species	Figitidae	Charipinae			pruni	(Hedicke, 1928, Charips)
507	valid	species	Figitidae	Charipinae			circumscripta	(Hartig, 1841, Xystus)	Synonymised under victrix by Fergusson (1986) but this has not been supported by other workers (Menke & Evenhuis, 1991; Van Veen et al., 2003).	England	Xystus	circumscriptus
508	valid	species	Figitidae	Charipinae			citripes	(Thomson, 1862, Allotria)		England, Wales	Allotria
509	syn	species	Figitidae	Charipinae			britannica	Kieffer, 1902 (Alloxysta citripes var.)
510	syn	species	Figitidae	Charipinae			albipes	(Kieffer, 1904, Allotria)
511	syn	species	Figitidae	Charipinae			brevicella	Belizin, 1966
512	valid	species	Figitidae	Charipinae			crassa	(Cameron, 1889, Allotria)	Raised from synonymy with macrophadnus by Ferrer-Suay et al. (2013a).	Scotland	Allotria
513	valid	species	Figitidae	Charipinae			cursor	(Hartig, 1840, Xystus)	Considered a nomen dubium in Ferrer-Suay et al. (2014a) but Evenhuis (1982) studied the type and subsequently identified British specimens as belonging to this taxon, so we see no problem with considering it a valid British species. It was listed as castanea in Quinlan (1978a) but not mentioned by Fergusson (1986) and then recorded again by Müller et al. (1999).	England	Xystus
514	syn	species	Figitidae	Charipinae			castanea	(Kieffer, 1904, Pezophycta) preocc.
515	valid	species	Figitidae	Charipinae			erythrothorax	(Hartig, 1840, Xystus)	Removed from synonymy with fulviceps by Pujade-Villar et al. (2011).	England, Scotland	Xystus
516	syn	species	Figitidae	Charipinae			trapezoidea	misident.
517	syn	species	Figitidae	Charipinae			defecta	(Hartig, 1841, Xystus)
518	syn	species	Figitidae	Charipinae			nigriventris	(Thomson, 1862, Allotria)
519	valid	species	Figitidae	Charipinae			consobrina	(Zetterstedt, 1838, Cynips)	Synonymised under victrix by Fergusson (1986) but raised from synonymy by Menke & Evenhuis (1991), a result supported by Van Veen et al. (2003).	England	Cynips
520	syn	species	Figitidae	Charipinae			fuscicornis	(Hartig, 1841, Xystus)	synonymy by Ferrer-Suay et al. (2013b)
521	syn	species	Figitidae	Charipinae			ancylocera	(Cameron, 1886, Allotria)
522	syn	species	Figitidae	Charipinae			brassicae	(Ashmead, 1887, Allotria)
523	syn	species	Figitidae	Charipinae			infuscata	(Kieffer, 1902, Allotria)
524	syn	species	Figitidae	Charipinae			aphidae	(Froggatt, 1904, Hypodiranchis)
525	syn	species	Figitidae	Charipinae			grioti	(De Santis, 1937, Charips)
526	valid	species	Figitidae	Charipinae			halterata	(Thomson, 1862, Allotria)	Synonymised under pedestris by Fergusson (1986) but considered here to be a valid species (Ferrer-Suay et al., 2012a).	England	Allotria
527	valid	species	Figitidae	Charipinae			leunisii	(Hartig, 1841, Xystus)	added by Van Veen et al. (2003).	England, Wales	Xystus
528	valid	species	Figitidae	Charipinae			macrophadnus	(Hartig, 1841, Xystus)		England, Scotland, Wales	Xystus
529	syn	species	Figitidae	Charipinae			testacea	misident.	Recorded as a misidentification of macrophadna by Fergusson (1986) but listed as a valid species, occurring in Britain, on Fauna Europaea, but with the comment that the species might be synonymous with pleuralis.
530	syn	species	Figitidae	Charipinae			aptera	misident.
531	syn	species	Figitidae	Charipinae			brachyptera	misident.
532	syn	species	Figitidae	Charipinae			fuscipes	misident.
533	syn	species	Figitidae	Charipinae			nigriventris	misident.
534	syn	species	Figitidae	Charipinae			macrophadna	misspelling
535	syn	species	Figitidae	Charipinae			filicornis	(Cameron, 1889, Allotria)
536	syn	species	Figitidae	Charipinae			scutellata	Kieffer, 1902
537	syn	species	Figitidae	Charipinae			rubromaculata	Kieffer, 1902 (Alloxysta nigriventris var.)
538	valid	species	Figitidae	Charipinae			marshalliana	(Kieffer, 1900, Nephycta)	Synonymised under macrophadna by Fergusson (1986) but considered here to be a valid species (Ferrer-Suay et al., 2012a, following pers. comm. by FVV).	Scotland	Nephycta
539	valid	species	Figitidae	Charipinae			mullensis	(Cameron, 1883, Allotria)	Raised from synonymy with brevis by Ferrer-Suay et al. (2012b).	Scotland	Allotria
540	valid	species	Figitidae	Charipinae			nigrita	(Thomson, 1862, Allotria)	added by Baker (2013).	Wales	Allotria
541	valid	species	Figitidae	Charipinae			obscurata	(Hartig, 1840, Xystus)	det. Van Veen, added here.	England	Xystus	obscuratus
542	syn	species	Figitidae	Charipinae			homotoma	Kieffer, 1904 (Alloxysta ullrichi var.)
543	valid	species	Figitidae	Charipinae			pallidicornis	(Curtis, 1838, Cynips)			Cynips
544	syn	species	Figitidae	Charipinae			minuta	(Zetterstedt, 1838, Cynips)
545	syn	species	Figitidae	Charipinae			forticornis	(Giraud, 1860, Allotria)
546	syn	species	Figitidae	Charipinae			basalis	(Thomson, 1862, Allotria)
547	syn	species	Figitidae	Charipinae			anthracina	Andrews, 1978
548	valid	species	Figitidae	Charipinae			pedestris	(Curtis, 1838, Cynips)		England, Wales, Ireland	Cynips
549	valid	species	Figitidae	Charipinae			piceomaculata	(Cameron, 1883, Allotria)	Raised from synonymy with macrophadnus by Ferrer-Suay et al. (2013a).	Scotland, Wales	Allotria
550	valid	species	Figitidae	Charipinae			pleuralis	(Cameron, 1879, Allotria)		England, Scotland, Ireland	Allotria
551	syn	species	Figitidae	Charipinae			unicolor	(Kieffer, 1902, Alloxysta pusilla var.)
552	syn	species	Figitidae	Charipinae			gautieri	Kieffer, 1922
553	valid	species	Figitidae	Charipinae			pusilla	(Kieffer, 1902, Allotria)	added by Sanders & Van Veen (2010).	England	Allotria
554	valid	species	Figitidae	Charipinae			ramulifera	(Thomson, 1862, Allotria)	added by Müller et al. (1999).	England	Allotria
555	syn	species	Figitidae	Charipinae			minuta	(Hartig, 1840, Xystus)
556	syn	species	Figitidae	Charipinae			discreta	(Förster, 1869, Nephycta)
557	syn	species	Figitidae	Charipinae			parvicellula	(Kieffer, 1904, Allotria)
558	valid	species	Figitidae	Charipinae			semiaperta	Fergusson, 1986	added by Fergusson (1986)	England, Ireland
559	valid	species	Figitidae	Charipinae			tscheki	(Giraud, 1860, Allotria)	Excluded from the British and Irish list by Fergusson (1988) but reinstated by Van Veen et al. (2003).	England	Allotria
560	valid	species	Figitidae	Charipinae			victrix	(Westwood, 1833, Allotria)		England, Scotland, Wales	Allotria
561	syn	species	Figitidae	Charipinae			fulviceps	(Curtis, 1838, Cynips)	synonymy by Pujade-Villar et al. (2011)
562	syn	species	Figitidae	Charipinae			ruficeps	(Zetterstedt, 1838, Cynips)
563	syn	species	Figitidae	Charipinae			erythrocephalus	(Hartig, 1840, Xystus)
564	syn	species	Figitidae	Charipinae			tritici	(Fitch, 1861, Allotria)
565	syn	species	Figitidae	Charipinae			macrocera	(Thomson, 1877, Allotria)
566	syn	species	Figitidae	Charipinae			amygdali	(Buckton, 1879, Cynips) nom. nud.
567	syn	species	Figitidae	Charipinae			atriceps	(Buckton, 1879, Cynips)
568	syn	species	Figitidae	Charipinae			curvicornis	(Cameron, 1883, Allotria)
569	syn	species	Figitidae	Charipinae			lateralis	(Kieffer, 1902, Allotria luteicornis var.)
570	syn	species	Figitidae	Charipinae			luteiceps	(Kieffer, 1902, Allotria victrix var.)
571	syn	species	Figitidae	Charipinae			luteicornis	(Kieffer, 1902, Allotria)
572	syn	species	Figitidae	Charipinae			areolata	(Kieffer, 1909, Charips)
573	syn	species	Figitidae	Charipinae			grandicornis	(Kieffer, 1904, Allotria)
574	syn	species	Figitidae	Charipinae			io	(Girault, 1932 Sarorthrus)
575	valid	genus	Figitidae	Charipinae		Apocharips		Fergusson, 1986
576	valid	species	Figitidae	Charipinae			trapezoidea	(Hartig, 1841, Xystus)		England, Wales	Xystus	trapezoideus
577	syn	species	Figitidae	Charipinae			xanthocephala	(Thomson, 1862, Allotria)
578	valid	genus	Figitidae	Charipinae		Dilyta		Förster, 1869
579	syn	genus	Figitidae	Charipinae		CHARIPS		Haliday in Marshall, 1870
580	syn	genus	Figitidae	Charipinae		GLYPTOXYSTA		Thomson, 1877
581	syn	genus	Figitidae	Charipinae		DYLITA		misspelling
582	valid	species	Figitidae	Charipinae			subclavata	Förster, 1869		England, Scotland, Wales
583	syn	species	Figitidae	Charipinae			microcera	(Haliday, 1870, Charips)
584	syn	species	Figitidae	Charipinae			heterocera	(Thomson, 1877, Glyptoxysta)
585	syn	species	Figitidae	Charipinae			talitzkii	(Belizin, 1966, Glyptoxysta)	synonymy by Paretas-Martínez et al. (2011).
586	valid	genus	Figitidae	Charipinae		Phaenoglyphis		Förster, 1869
587	syn	genus	Figitidae	Charipinae		HEMICRISIS		Förster, 1869	Fergusson (1986) established Hemicrisis (including only ruficornis) as a synonym of Phaenoglyphis, it was then raised from synonymy by Ronquist (1999) only to be synonymised again with Phaenoglyphis by Pujade-Villar & Paretas-Martínez (2006).
588	syn	genus	Figitidae	Charipinae		AULOXYSTA		Thomson, 1877
589	syn	genus	Figitidae	Charipinae		BOTHRIOXYSTA		Kieffer, 1902
590	syn	genus	Figitidae	Charipinae		CHARIPSELLA		Bréthes, 1913
591	valid	species	Figitidae	Charipinae			dolichocera	(Cameron, 1889, Allotria)		England, Ireland	Allotria
592	valid	species	Figitidae	Charipinae			longicornis	(Hartig, 1840, Xystus)	Listed by Quinlan (1978a) as a species of Alloxysta, not mentioned by Fergusson (1986), recorded as British by Baker (2013) based on specimens identified by M. Ferrer-Suay.	Wales	Xystus
593	valid	species	Figitidae	Charipinae			ruficornis	(Förster, 1869, Hemicrisis)	Phaenoglyphis pubicollis (Thomson, 1877, Allotria) was resurrected as a valid species by Pujade-Villar & Paretas-Martinez (2006). The authors did not examine material from a wide range but state that pubicollis ‘is only represented by type material’, implying that the real ruficornis is the widespread one.	England, Wales	Hemicrisis
594	valid	species	Figitidae	Charipinae			salicis	(Cameron, 1883, Allotria)		England, Wales	Allotria
595	syn	species	Figitidae	Charipinae			forticornis	Cameron, 1888
596	valid	species	Figitidae	Charipinae			villosa	(Hartig, 1841, Xystus)		England, Wales	Xystus	villosus
597	syn	species	Figitidae	Charipinae			piciceps	(Thomson, 1862, Allotria)
598	syn	species	Figitidae	Charipinae			collina	(Cameron, 1889, Allotria)
599	syn	species	Figitidae	Charipinae			ambrosiae	(Ashmead, 1898, Allotria)
600	syn	species	Figitidae	Charipinae			carpentieri	(Kieffer, 1902, Allotria)
601	syn	species	Figitidae	Charipinae			foveigera	(Kieffer, 1902, Allotria)
602	syn	species	Figitidae	Charipinae			curvata	(Kieffer, 1902, Allotria)
603	syn	species	Figitidae	Charipinae			recticornis	(Kieffer, 1902, Allotria)
604	syn	species	Figitidae	Charipinae			subaptera	(Kieffer, 1904, Alloxysta)
605	syn	species	Figitidae	Charipinae			campyla	(Kieffer, 1904, Alloxysta)
606	syn	species	Figitidae	Charipinae			necans	(Kieffer, 1909, Glyptoxysta)
607	syn	species	Figitidae	Charipinae			numidica	(Kieffer, 1909, Bothrioxysta)
608	syn	species	Figitidae	Charipinae			bifoveata	(Girault, 1931, Glyptoxysta)
609	syn	species	Figitidae	Charipinae			islandica	(Hellén, 1931, Alloxysta)
610	syn	species	Figitidae	Charipinae			flavipes	(Ionescu, 1963 Charips)
611	valid	species	Figitidae	Charipinae			xanthocroa	Förster, 1869		England
612	syn	species	Figitidae	Charipinae			rufa	(Thomson, 1877, Allotria)
613	syn	species	Figitidae	Charipinae			obfuscata	Kieffer, 1901
614	valid	Subfamily	Figitidae	Eucoilinae				Thomson, 1862	Eucoilinae has been a subfamily of Figitidae rather than a family of its own since Ronquist (1999). Tribal classification follows Forshage & Nordlander (2008). Synomymy and distribution data taken from Quinlan (1978b), Nordlander (1978, 1980, 1981) and Forshage & Nordlander (2008), supplemented by Fauna Europaea and MF’s identifications of material in BMNH. Some Irish records from O’Connor (2004).
615	valid	tribe	Figitidae	EUCOILINAE	Diglyphosematini			Belizin, 1961
616	valid	genus	Figitidae	Eucoilinae	Diglyphosematini	Diglyphosema		Förster, 1869
617	valid	species	Figitidae	Eucoilinae	Diglyphosematini		conjungens	Kieffer, 1904		England, Wales, Ireland
618	valid	genus	Figitidae	Eucoilinae	Diglyphosematini	Disorygma		Förster, 1869
619	syn	genus	Figitidae	EUCOILINAE	Diglyphosematini	ECTOLYTA		Förster, 1869
620	syn	genus	Figitidae	EUCOILINAE	Diglyphosematini	ERISPHAGIA		Förster, 1869
621	valid	species	Figitidae	Eucoilinae	Diglyphosematini		curtum	(Giraud, 1860, Eucoila)	BMNH, det. Forshage, added here.	England	Eucoila	curta
622	valid	species	Figitidae	Eucoilinae	Diglyphosematini		depile	(Giraud, 1860, Eucoila)		England, Ireland	Eucoila	depilis
623	syn	species	Figitidae	EUCOILINAE	Diglyphosematini		incrassata	(Thomson, 1862, Cothonaspis)
624	syn	species	Figitidae	EUCOILINAE	Diglyphosematini		divulgata	Förster, 1869
625	valid	genus	Figitidae	Eucoilinae	Diglyphosematini	Microstilba		Förster, 1869
626	valid	species	Figitidae	Eucoilinae	Diglyphosematini		striolata	Kieffer, 1901	Supposed English specimens in BMNH are all Disorygma curtum (det. MF).	Scotland
627	syn	species	Figitidae	EUCOILINAE	Diglyphosematini		heterogena	(Giraud, 1860, Eucoila) auctt., sensu Cameron
628	valid	tribe	Figitidae	EUCOILINAE	EUCOILINI			Thomson, 1862
629	valid	species	Figitidae	Eucoilinae	Eucoilini		Eucoila	Westwood, 1833
630	syn	genus	Figitidae	EUCOILINAE	EUCOILINI	EUCOELA		Agassiz, 1846
631	syn	genus	Figitidae	EUCOILINAE	EUCOILINI	LYTOSEMA		Kieffer, 1901
632	syn	genus	Figitidae	EUCOILINAE	EUCOILINI	PSILODORA		Förster, 1869
633	valid	species	Figitidae	Eucoilinae	Eucoilini		crassinerva	Westwood, 1833		England, Scotland, Ireland
634	syn	species	Figitidae	EUCOILINAE	EUCOILINI		boyenii	(Hartig, 1840, Cothonaspis)
635	syn	species	Figitidae	EUCOILINAE	EUCOILINI		intermedia	(Kieffer, 1901, Psilodora)
636	valid	species	Figitidae	Eucoilinae	Eucoilini		maculata	(Hartig, 1840, Cothonaspis)		England, Scotland	Cothonaspis	maculatus
637	syn	species	Figitidae	EUCOILINAE	EUCOILINI		guerini	Dahlbom, 1842
638	syn	species	Figitidae	EUCOILINAE	EUCOILINI		brevialata	Belizin, 1973
639	valid	species	Figitidae	Eucoilinae	Eucoilini		Leptopilina	Förster, 1869	Synonymy from Nordlander (1980).
640	valid	species	Figitidae	Eucoilinae	Eucoilini		clavipes	(Hartig, 1841, Cothonaspis)	BMNH, det. Forshage, added here.		Cothonaspis
641	valid	species	Figitidae	Eucoilinae	Eucoilini		fimbriata	(Kieffer, 1901, Eucoela)	Treated as Episoda xanthoneura by Quinlan (1978b).	England	Eucoela
642	syn	species	Figitidae	EUCOILINAE	EUCOILINI		xanthoneura	nec (Förster, 1869, Episoda) sensu Quinlan -1978
643	syn	species	Figitidae	EUCOILINAE	EUCOILINI		longipes	(Cameron, 1883, Erisphagia) preocc.
644	syn	species	Figitidae	EUCOILINAE	EUCOILINI		xanthopum	(Kieffer, 1904, Psilosema)
645	syn	species	Figitidae	EUCOILINAE	EUCOILINI		filicorne	(Kieffer, 1904, Psilosema)
646	syn	species	Figitidae	EUCOILINAE	EUCOILINI		longicorne	(Kieffer, 1907, Psilosema)
647	syn	species	Figitidae	EUCOILINAE	EUCOILINI		dolichocera	(Hellén, 1960, Episoda)
648	valid	species	Figitidae	Eucoilinae	Eucoilini		heterotoma	(Thomson, 1862, Eucoila)	Treated as Ganaspis subnuda by Quinlan (1978b).	England, Ireland	Eucoila
649	syn	species	Figitidae	EUCOILINAE	EUCOILINI		?musti	(Rondani, 1875, Xystus)
650	syn	species	Figitidae	EUCOILINAE	EUCOILINI		monilicornis	(Kieffer, 1904, Ganaspis)
651	syn	species	Figitidae	EUCOILINAE	EUCOILINI		subnuda	(Kieffer, 1904, Ganaspis)
652	syn	species	Figitidae	EUCOILINAE	EUCOILINI		philippinensis	(Kieffer, 1916, Erisphagia)
653	syn	species	Figitidae	EUCOILINAE	EUCOILINI		bochei	(Weld, 1944, Pseudeucoila)
654	valid	species	Figitidae	Eucoilinae	Eucoilini		longipes	(Hartig, 1841, Cothonaspis)	BMNH, det. Forshage, added here.	England	Cothonaspis
655	valid	genus	Figitidae	Eucoilinae	Eucoilini	Trybliographa		Förster, 1869	Synonymy mostly from Nordlander (1981). Several new species of Trybliographa are present in Britain and several new synonymies will result from MF’s unpublished revision. Some changes have been made in anticipation of this publication as they affect names described from British specimens.
656	syn	genus	Figitidae	EUCOILINAE	EUCOILINI	EPISODA		Förster, 1869	Nordlander (1980).
657	syn	genus	Figitidae	EUCOILINAE	EUCOILINI	IDIOMORPHA		Förster, 1869
658	syn	genus	Figitidae	EUCOILINAE	EUCOILINI	HYPOLETHRIA		Förster, 1869
659	syn	genus	Figitidae	EUCOILINAE	EUCOILINI	PSICHACRA		Förster, 1869
660	syn	genus	Figitidae	EUCOILINAE	EUCOILINI	ADIERIS		Förster, 1869
661	syn	genus	Figitidae	EUCOILINAE	EUCOILINI	PIEZOBRIA		Förster, 1869
662	syn	genus	Figitidae	EUCOILINAE	EUCOILINI	PILINOTHRIX		Förster, 1869
663	syn	genus	Figitidae	EUCOILINAE	EUCOILINI	ANECTOCLIS		Förster, 1869
664	syn	genus	Figitidae	EUCOILINAE	EUCOILINI	COTHONASPIS		auctt. nec Hartig, 1840
665	syn	genus	Figitidae	EUCOILINAE	EUCOILINI	DIMICROSTROPHIS		Ashmead, 1886
666	syn	genus	Figitidae	EUCOILINAE	EUCOILINI	DUSMETIOLA		Tavares, 1924
667	syn	genus	Figitidae	EUCOILINAE	EUCOILINI	EUCOILA		auctt. nec Westwood, 1835
668	syn	genus	Figitidae	EUCOILINAE	EUCOILINI	PSEUDEUCOILA		Ashmead, 1903
669	valid	species	Figitidae	Eucoilinae	Eucoilini		agaricola	(Thomson, 1862, Eucoila)	BMNH, det. Forshage, added here.	England	Eucoila
670	valid	species	Figitidae	Eucoilinae	Eucoilini		albipennis	(Thomson, 1861, Eucoila)		England	Eucoila
671	syn	species	Figitidae	EUCOILINAE	EUCOILINI		spaniandra	Kerrich & Quinlan, 1960
672	valid	species	Figitidae	Eucoilinae	Eucoilini		atra	(Hartig, 1840, Cothonaspis)		England, Scotland, Ireland	Cothonaspis	ater
673	syn	species	Figitidae	EUCOILINAE	EUCOILINI		nigricornis	Cameron, 1883
674	valid	species	Figitidae	Eucoilinae	Eucoilini		cubitalis	(Hartig, 1841, Cothonaspis)		England, Ireland	Cothonaspis
675	valid	species	Figitidae	Eucoilinae	Eucoilini		diaphana	(Hartig, 1841, Cothonaspis)		England, Scotland, Wales, Ireland	Cothonaspis
676	valid	species	Figitidae	Eucoilinae	Eucoilini		erythrocera	(Thomson, 1877, Eucoila)	BMNH, det. Forshage, added here. Generic combination not yet formally published.	England	Eucoila
677	valid	species	Figitidae	Eucoilinae	Eucoilini		fovealis	(Thomson, 1862, Eucoila)	BMNH, det. Forshage, added here.	England	Eucoila
678	valid	species	Figitidae	Eucoilinae	Eucoilini		glottiana	(Cameron, 1883, Psichacra)		England, Scotland	Psichacra
679	syn	species	Figitidae	EUCOILINAE	EUCOILINI		proxima	(Cameron, 1889, Eucoila)
680	syn	species	Figitidae	EUCOILINAE	EUCOILINI		agaricorum	(Kieffer, 1902, Eucoela)
681	valid	species	Figitidae	Eucoilinae	Eucoilini		gracilicornis	(Cameron, 1888, Eucoila)		England, Scotland, Wales, Ireland	Eucoila
682	valid	species	Figitidae	Eucoilinae	Eucoilini		longicornis	(Hartig, 1840, Cothonaspis)		England, Ireland	Cothonaspis
683	syn	species	Figitidae	EUCOILINAE	EUCOILINI		gracilis	(Dahlbom, 1846, Eucoila)
684	syn	species	Figitidae	EUCOILINAE	EUCOILINI		subspinosa	(Kieffer, 1904, Cothonaspis)
685	valid	species	Figitidae	Eucoilinae	Eucoilini		mandibularis	(Zetterstedt, 1838, Figites)	Unpublished synonymy.	England, Scotland	Figites
686	syn	species	Figitidae	EUCOILINAE	EUCOILINI		similis	(Cameron, 1883, Psichacra)
687	syn	species	Figitidae	EUCOILINAE	EUCOILINI		testaceipes	Cameron, 1883	Unpublished synonymy.
688	valid	species	Figitidae	Eucoilinae	Eucoilini		nigripes	(Giraud, 1860, Eucoila)	BMNH, det. Forshage, added here.	England	Eucoila
689	valid	species	Figitidae	Eucoilinae	Eucoilini		rapae	(Westwood, 1835, Eucoila)		England, Scotland, Wales, Ireland	Eucoila
690	syn	species	Figitidae	EUCOILINAE	EUCOILINI		coronata	(Hartig, 1841, Cothonaspis)
691	syn	species	Figitidae	EUCOILINAE	EUCOILINI		insignis	(Giraud, 1860, Eucoila)
692	syn	species	Figitidae	EUCOILINAE	EUCOILINI		octotoma	(Thomson, 1862, Eucoila)
693	syn	species	Figitidae	EUCOILINAE	EUCOILINI		scutellaris	Förster, 1869
694	syn	species	Figitidae	EUCOILINAE	EUCOILINI		scutellaris	nec (Latreille, 1805, Figites) sensu Hartig, 1840
695	syn	species	Figitidae	EUCOILINAE	EUCOILINI		melanocera	(Förster, 1869, Idiomorpha)
696	syn	species	Figitidae	EUCOILINAE	EUCOILINI		crassicornis	Cameron, 1889
697	syn	species	Figitidae	EUCOILINAE	EUCOILINI		fortinervis	(Cameron, 1889, Eucoila)
698	syn	species	Figitidae	EUCOILINAE	EUCOILINI		ventralis	(Kieffer, 1901, Eucoela)
699	syn	species	Figitidae	EUCOILINAE	EUCOILINI		ruficornis	(Kieffer, 1902, Eucoela)
700	syn	species	Figitidae	EUCOILINAE	EUCOILINI		erythrocera	nec (Thomson, 1862, Eucoela) sensu Cameron, 1890
701	syn	species	Figitidae	EUCOILINAE	EUCOILINI		britannica	(Kieffer, 1905, Eucoela)
702	valid	species	Figitidae	Eucoilinae	Eucoilini		rufula	(Förster, 1855, Eucoila)		England, Ireland	Eucoila
703	syn	species	Figitidae	EUCOILINAE	EUCOILINI		dalei	(Cameron, 1879, Psichacra)
704	valid	species	Figitidae	Eucoilinae	Eucoilini		scotica	(Cameron, 1889, Eucoila)	Removed from synonymy with trichopsila by MF (unpublished).	England, Scotland	Eucoila
705	valid	species	Figitidae	Eucoilinae	Eucoilini		strandi	(Hedicke, 1914, Cothonaspis)	BMNH, det. Forshage, added here.	England	Cothonaspis
706	valid	species	Figitidae	Eucoilinae	Eucoilini		subnebulosa	(Giraud, 1860, Eucoila)	BMNH, det. Forshage, added here.	England	Eucoila
707	valid	species	Figitidae	Eucoilinae	Eucoilini		trichopsila	(Hartig, 1841, Cothonaspis)		England	Cothonaspis	trichopsilus
708	syn	species	Figitidae	EUCOILINAE	EUCOILINI		brachytricha	(Kieffer, 1901, Eucoela)
709	syn	species	Figitidae	EUCOILINAE	EUCOILINI		claripennis	(Thomson, 1862, Eucoila)
710	valid	tribe	Figitidae	EUCOILINAE	GANASPINI			Belizin, 1961
711	valid	genus	Figitidae	Eucoilinae	Ganaspini	Chrestosema		Förster, 1869	species of Chrestosema excluded from the British and Irish list: [antennale Kieffer, 1904; England, Ireland] This name will be placed in synonymy
712	syn	genus	Figitidae	EUCOILINAE	GANASPINI	RECENTIA		Belizin, 1961
713	valid	species	Figitidae	Eucoilinae	Ganaspini		erythropum	Förster, 1869	BMNH, det. Forshage, added here.	England
714	valid	genus	Figitidae	Eucoilinae	Ganaspini	Didyctium		Riley, 1879
715	syn	genus	Figitidae	EUCOILINAE	GANASPINI	HEPTAMEROCERA		Ashmead, 1896
716	valid	species	Figitidae	Eucoilinae	Ganaspini		nigriclava	(Kieffer, 1904, Cothanaspis)	BMNH, det. Forshage, added here.	England, Wales	Cothanaspis
717	valid	genus	Figitidae	Eucoilinae	Ganaspini	Ganaspis		Förster, 1869
718	valid	species	Figitidae	Eucoilinae	Ganaspini		mundata	Förster, 1869	BMNH, det. Forshage, added here.	England
719	syn	species	Figitidae	EUCOILINAE	GANASPINI		tenuicornis	Kieffer, 1904
720	valid	species	Figitidae	Eucoilinae	Ganaspini		seticornis	(Hellén, 1960, Episoda)	BMNH, det. Forshage, added here.	England, Scotland	Episoda
721	syn	species	Figitidae	EUCOILINAE	GANASPINI		ciliaria	(Belizin, 1968, Odonteucoila)
722	valid	genus	Figitidae	Eucoilinae	Ganaspini	Glauraspidia		Thomson, 1861
723	syn	genus	Figitidae	EUCOILINAE	GANASPINI	AGLAOTOMA		Förster, 1869
724	syn	genus	Figitidae	EUCOILINAE	GANASPINI	APHISTOPHYZA		Förster, 1869
725	syn	genus	Figitidae	EUCOILINAE	GANASPINI	DIRANCHIS		Förster, 1869
726	syn	genus	Figitidae	EUCOILINAE	GANASPINI	CRYPTEUCOELA		Kieffer, 1904
727	syn	genus	Figitidae	EUCOILINAE	GANASPINI	AGLAOTOMIDEA		Rohwer & Fagan, 1917
728	valid	species	Figitidae	Eucoilinae	Ganaspini		microptera	(Hartig, 1840, Cothonaspis)		England, Wales, Ireland	Cothonaspis	micropterus
729	syn	species	Figitidae	EUCOILINAE	GANASPINI		codrina	(Hartig, 1841, Cothonaspis)
730	syn	species	Figitidae	EUCOILINAE	GANASPINI		subtilis	(Dahlbom, 1842, Eucoela)
731	syn	species	Figitidae	EUCOILINAE	GANASPINI		carpentieri	Kieffer, 1901
732	syn	species	Figitidae	EUCOILINAE	GANASPINI		giraudi	(Kieffer, 1902, Aglaotoma)
733	syn	species	Figitidae	EUCOILINAE	GANASPINI		foersteri	(Kieffer, 1904, Aglaotoma)
734	syn	species	Figitidae	EUCOILINAE	GANASPINI		giraudi	(Kieffer, 1904, Crypteucoela) preocc.
735	syn	species	Figitidae	EUCOILINAE	GANASPINI		elegans	Ionescu, 1963
736	valid	genus	Figitidae	Eucoilinae	Ganaspini	Hexacola		Förster, 1869
737	syn	genus	Figitidae	EUCOILINAE	GANASPINI	HEXAPLASTA		Förster, 1869
738	valid	species	Figitidae	Eucoilinae	Ganaspini		hexatoma	(Hartig, 1841, Cothonaspis)		England	Cothonaspis
739	syn	species	Figitidae	EUCOILINAE	GANASPINI		picicrus	(Giraud, 1860, Eucoila)
740	syn	species	Figitidae	EUCOILINAE	GANASPINI		fuscipes	(Mayer, 1923, Cothonaspis)
741	valid	genus	Figitidae	Eucoilinae	Ganaspini	Mirandicola		Belizin, 1968
742	syn	genus	Figitidae	EUCOILINAE	GANASPINI	PSEUDOPSICHACRA		Quinlan, 1975
743	valid	species	Figitidae	Eucoilinae	Ganaspini		sericea	(Thomson, 1877, Glauraspidia)		England, Ireland	Glauraspidia
744	syn	species	Figitidae	EUCOILINAE	GANASPINI		bispinosa	(Kieffer, 1901, Eucoela)
745	syn	species	Figitidae	EUCOILINAE	GANASPINI		sauteri	(Hedicke, 1913, Psichacra)
746	valid	tribe	Figitidae	EUCOILINAE	KLEIDOTOMINI			Hellén, 1960
747	valid	genus	Figitidae	Eucoilinae	Kleidotomini	Cothonaspis		Hartig, 1840
748	syn	genus	Figitidae	EUCOILINAE	KLEIDOTOMINI	PSILOSEMA		Kieffer, 1901
749	valid	species	Figitidae	Eucoilinae	Kleidotomini		gracilis	Hartig, 1841		England
750	syn	species	Figitidae	EUCOILINAE	KLEIDOTOMINI		giraudi	(Dalla Torre & Kieffer, 1910, Erisphagia)
751	valid	species	Figitidae	Eucoilinae	Kleidotomini		longula	Nordlander, 1976		England
752	valid	species	Figitidae	Eucoilinae	Kleidotomini		pentatoma	Hartig, 1841		England, Scotland
753	valid	genus	Figitidae	Eucoilinae	Kleidotomini	Eutrias		Förster, 1869
754	valid	species	Figitidae	Eucoilinae	Kleidotomini		tritoma	(Thomson, 1877, Eucoila)		England	Eucoila
755	valid	genus	Figitidae	Eucoilinae	Kleidotomini	Kleidotoma		Westwood, 1833	Subgeneric classification was finally abandoned and all subgeneric names considered mere synonyms in Forshage & Nordlander (2008). Species of Kleidotoma removed from the British and Irish list: [myrmecophila Kieffer, 1908] - Recorded from Britain in Fauna Europaea but in error.
756	syn	genus	Figitidae	EUCOILINAE	KLEIDOTOMINI	APHYOPTERA		Förster, 1869
757	syn	genus	Figitidae	EUCOILINAE	KLEIDOTOMINI	APHILOPTERA		Förster, 1869
758	syn	genus	Figitidae	EUCOILINAE	KLEIDOTOMINI	AGROSCOPA		Förster, 1869
759	syn	genus	Figitidae	EUCOILINAE	KLEIDOTOMINI	HEPTAMERIS		Förster, 1869
760	syn	genus	Figitidae	EUCOILINAE	KLEIDOTOMINI	NEDINOPTERA		Förster, 1869
761	syn	genus	Figitidae	EUCOILINAE	KLEIDOTOMINI	RHYNCHACIS		Förster, 1869
762	syn	genus	Figitidae	EUCOILINAE	KLEIDOTOMINI	PENTACRITA		Förster, 1869
763	syn	genus	Figitidae	EUCOILINAE	KLEIDOTOMINI	TETRAHOPTRA		Förster, 1869
764	syn	genus	Figitidae	EUCOILINAE	KLEIDOTOMINI	TETRATOMA		Cameron, 1890
765	syn	genus	Figitidae	EUCOILINAE	KLEIDOTOMINI	ARHOPTRA		Kieffer, 1901
766	syn	genus	Figitidae	EUCOILINAE	KLEIDOTOMINI	PENTARHOPTRA		Kieffer, 1901
767	syn	genus	Figitidae	EUCOILINAE	KLEIDOTOMINI	SCHIZOSEMA		Kieffer, 1901
768	syn	genus	Figitidae	EUCOILINAE	KLEIDOTOMINI	KLEIDOTOMIDEA		Rohwer & Fagan, 1917
769	syn	genus	Figitidae	EUCOILINAE	KLEIDOTOMINI	PENTAKLEIDOTA		Weld, 1951
770	valid	species	Figitidae	Eucoilinae	Kleidotomini		affinis	Cameron, 1889		Scotland
771	valid	species	Figitidae	Eucoilinae	Kleidotomini		caledonica	Cameron, 1888		England, Scotland, Ireland
772	valid	species	Figitidae	Eucoilinae	Kleidotomini		ciliaris	(Zetterstedt, 1838, Figites)	Usually regarded as a species of Trybliographa but published as a new combination in Kleidotoma by Jonsell et al. (1999) in an ecological paper and listed as such in Fauna Europaea. The ciliaris sensu aucti. nec Zetterstedt, refers to various small Trybliographa spp.	England, Scotland	Figites
773	syn	species	Figitidae	EUCOILINAE	KLEIDOTOMINI		melanopoda	Cameron, 1888
774	valid	species	Figitidae	Eucoilinae	Kleidotomini		dolichocera	Thomson, 1877		England, Wales, Ireland
775	syn	species	Figitidae	EUCOILINAE	KLEIDOTOMINI		carpentieri	(Kieffer, 1904, Cleidotoma)
776	valid	species	Figitidae	Eucoilinae	Kleidotomini		elegans	Cameron, 1889		England, Scotland
777	valid	species	Figitidae	Eucoilinae	Kleidotomini		filicornis	Cameron, 1889		England
778	valid	species	Figitidae	Eucoilinae	Kleidotomini		gracilicornis	Cameron, 1889		England
779	valid	species	Figitidae	EUCOILINAE	KLEIDOTOMINI		?gryphus	Thomson, 1861
780	valid	species	Figitidae	Eucoilinae	Kleidotomini		halophila	Thomson, 1861		England
781	valid	species	Figitidae	Eucoilinae	Kleidotomini		hexatoma	Thomson, 1862		England, Scotland
782	valid	species	Figitidae	Eucoilinae	Kleidotomini		longicornis	Cameron, 1889		England, Scotland
783	valid	species	Figitidae	Eucoilinae	Kleidotomini		longipennis	Cameron, 1889		England, Scotland, Ireland
784	valid	species	Figitidae	Eucoilinae	Kleidotomini		marshalli	Cameron, 1889		England, Ireland
785	syn	species	Figitidae	EUCOILINAE	KLEIDOTOMINI		antecella	Belizin, 1964
786	valid	species	Figitidae	Eucoilinae	Kleidotomini		nigra	(Hartig, 1840, Cothonaspis)		England, Scotland, Ireland	Cothonaspis	niger
787	syn	species	Figitidae	EUCOILINAE	KLEIDOTOMINI		crassiclava	Cameron, 1888
788	syn	species	Figitidae	EUCOILINAE	KLEIDOTOMINI		nigripes	Cameron, 1888
789	syn	species	Figitidae	EUCOILINAE	KLEIDOTOMINI		brevicornis	(Kieffer, 1904, Rhynchasis)
790	syn	species	Figitidae	EUCOILINAE	KLEIDOTOMINI		tetramora	(Kieffer, 1904, Rhynchasis)
791	valid	species	Figitidae	Eucoilinae	Kleidotomini		pentatoma	Thomson, 1861		England, Scotland, Ireland
792	syn	species	Figitidae	EUCOILINAE	KLEIDOTOMINI		albipennis	Cameron, 1886 nec Thomson, 1861
793	valid	species	Figitidae	Eucoilinae	Kleidotomini		picipes	Cameron, 1886		Scotland, Ireland
794	valid	species	Figitidae	Eucoilinae	Kleidotomini		psiloides	Westwood, 1833		England, Wales
795	valid	species	Figitidae	Eucoilinae	Kleidotomini		pygmea	(Dahlbom, 1842, Eucoila)		England, Ireland	Eucoila
796	valid	species	Figitidae	Eucoilinae	Kleidotomini		striata	Cameron, 1886		England, Scotland
797	valid	species	Figitidae	Eucoilinae	Kleidotomini		striaticollis	Cameron, 1880		England, Scotland
798	valid	species	Figitidae	Eucoilinae	Kleidotomini		subaptera	(Walker, 1834, Figites)		England, Wales, Ireland	Figites
799	syn	species	Figitidae	EUCOILINAE	KLEIDOTOMINI		helgolandica	(Förster, 1869, Agroscopa)
800	valid	species	Figitidae	Eucoilinae	Kleidotomini		thomsoni	Forshage, sp. nov., replacement name		England, Scotland, Ireland
801	syn	species	Figitidae	EUCOILINAE	KLEIDOTOMINI		tetratoma	Thomson, 1861 preocc.	Name preoccupied by Kleidotoma tetratoma (Hartig, 1841, Cothonaspis).
802	valid	species	Figitidae	Eucoilinae	Kleidotomini		tomentosa	(Giraud, 1860, Eucoila)		England	Eucoila
803	syn	species	Figitidae	EUCOILINAE	KLEIDOTOMINI		anisomera	(Förster, 1869, Aphiloptera)
804	syn	species	Figitidae	EUCOILINAE	KLEIDOTOMINI		erythropa	Thomson, 1877
805	valid	species	Figitidae	Eucoilinae	Kleidotomini		truncata	Cameron, 1889		England, Scotland
806	valid	tribe	Figitidae	EUCOILINAE	TRICHOPLASTINI			Kovalev, 1989
807	valid	genus	Figitidae	Eucoilinae	Trichoplastini	Rhoptromeris		Förster, 1869	Species of Rhoptromeris removed from the British and Irish list: [nigriventris Nordlander, 1978] - Rhoptromeris nigriventris was listed by Quinlan (1978b) but this was most likely a mistake. Nordlander (1978) mentions that some Swedish paratypes were deposited in BMNH. There are no British or Irish specimens identified as nigriventris in the collection. Synonymy taken from Nordlander (1978).
808	syn	genus	Figitidae	EUCOILINAE	TRICHOPLASTINI	MIOMOERA		Förster, 1869
809	syn	genus	Figitidae	EUCOILINAE	TRICHOPLASTINI	HEXAMEROCERA		Kieffer, 1901
810	syn	genus	Figitidae	EUCOILINAE	TRICHOPLASTINI	STRIATELLIA		Belizin, 1966
811	valid	species	Figitidae	Eucoilinae	Trichoplastini		heptoma	(Hartig, 1840, Cothonaspis)		England, Scotland, Wales, Ireland	Cothonaspis	heptomus
812	syn	species	Figitidae	EUCOILINAE	TRICHOPLASTINI		biscapus	(Hartig, 1840, Cothonaspis)
813	syn	species	Figitidae	EUCOILINAE	TRICHOPLASTINI		eucera	(Hartig, 1841, Cothonaspis)
814	syn	species	Figitidae	EUCOILINAE	TRICHOPLASTINI		nodosa	(Giraud, 1860, Eucoila)
815	syn	species	Figitidae	EUCOILINAE	TRICHOPLASTINI		parvula	(Thomson, 1862, Eucoila)
816	syn	species	Figitidae	EUCOILINAE	TRICHOPLASTINI		aberrans	(Förster, 1869, Miomoera)
817	syn	species	Figitidae	EUCOILINAE	TRICHOPLASTINI		aequalis	(Kieffer, 1901, Eucoela)
818	syn	species	Figitidae	EUCOILINAE	TRICHOPLASTINI		widhalmi	Kurdjumov, 1912
819	valid	species	Figitidae	Eucoilinae	Trichoplastini		villosa	(Hartig, 1840, Cothonaspis)	BMNH, det. Forshage, added here.	England, Wales, Ireland	Cothonaspis	villosus
820	valid	genus	Figitidae	Eucoilinae	Trichoplastini	Trichoplasta		Benoit, 1956
821	valid	species	Figitidae	EUCOILINAE	TRICHOPLASTINI		sp. indet.		BMNH, det. Forshage, added here. Only a single male specimen has been found amongst British material; it is not identifiable to species level with our current state of knowledge, and is listed here as a record of the genus from Britain.
822	valid	Subfamily	Figitidae	Figitinae				Hartig, 1840	Melanips has been transferred to Aspicerinae by Buffington et al. (2007).
823	valid	genus	Figitidae	Figitinae		Amphithectus		Hartig, 1840	Removed from synonymy with Sarothrus by Ronquist (1999).
824	valid	species	Figitidae	Figitinae			areolatus	(Hartig, 1840, Sarothrus)		England	Sarothrus
825	syn	species	Figitidae	Figitinae			dahlbomii	Hartig, 1840
826	syn	species	Figitidae	Figitinae			piceus	(Dahlbom, 1842, Figites) nom. nud.
827	syn	species	Figitidae	Figitinae			fumipennis	(Giraud, 1860, Melanips)
828	valid	genus	Figitidae	Figitinae		Figites		Latreille, 1802	Species of Figites excluded from the British and Irish list: [laevigatus Dahlbom, 1842]; [reinhardi Kieffer, 1901]; urticarum Dahlbom, 1842] - Included in Quinlan (1978b) but not by Fergusson (1986).
829	syn	genus	Figitidae	Figitinae		PSILOGASTER		Hartig, 1840
830	syn	genus	Figitidae	Figitinae		PYCNOTRICHIA		Förster, 1869
831	syn	genus	Figitidae	Figitinae		OMALOSPOIDES		Hedicke, 1913
832	syn	genus	Figitidae	Figitinae		SEITNERIA		Tavares, 1928
833	valid	species	Figitidae	Figitinae			anthomyiarum	Bouché, 1834		England, Ireland
834	valid	species	Figitidae	Figitinae			consobrinus	Giraud, 1860		England, Ireland
835	syn	species	Figitidae	Figitinae			scutellaris	misident.
836	syn	species	Figitidae	Figitinae			dentiscuta	Hellén, 1937	synonymy by Fergusson (1986).
837	valid	species	Figitidae	Figitinae			ictus	Fergusson, 1986	added by Fergusson (1986)	England, Ireland
838	valid	species	Figitidae	Figitinae			scutellaris	(Rossi, 1794, Cynips)		England
839	syn	species	Figitidae	Figitinae			ruficornis	(Rossi, 1794, Cynips)
840	syn	species	Figitidae	Figitinae			abbreviator	(Herrich-Schäffer in Panzer, 1801, Ophion)
841	syn	species	Figitidae	Figitinae			tibialis	(Hartig, 1840, Psilogaster)
842	syn	species	Figitidae	Figitinae			letzneri	(Hedicke, 1913, Omalaspoides)
843	valid	genus	Figitidae	Figitinae		Lonchidia		Thomson, 1862
844	valid	species	Figitidae	Figitinae			clavicornis	Thomson, 1862		England, Scotland, Ireland
845	valid	species	Figitidae	Figitinae			maculipennis	(Dahlbom, 1842, Figites)		England, Ireland	Figites
846	valid	genus	Figitidae	Figitinae		Sarothrus		Hartig, 1840
847	valid	species	Figitidae	Figitinae			tibialis	(Zetterstedt, 1838, Cynips)		England, Wales, Ireland	Cynips
848	syn	species	Figitidae	Figitinae			canaliculatus	Hartig, 1840
849	syn	species	Figitidae	Figitinae			silesiacus	(Hedicke, 1913, Omalaspoides)
850	valid	genus	Figitidae	Figitinae		Xyalophora		Kieffer, 1901
851	valid	species	Figitidae	Figitinae			clavata	(Giraud, 1860, Figites)		Wales, Ireland	Figites	clavatus
852	valid	genus	Figitidae	Figitinae		Zygosis		Förster, 1869
853	syn	genus	Figitidae	Figitinae		DICERAEA		Förster, 1869
854	syn	genus	Figitidae	Figitinae		THYREOCERA		Ashmead, 1887
855	valid	species	Figitidae	Figitinae			urticeti	(Dahlbom, 1842, Figites)		England, Ireland	Figites
856	syn	species	Figitidae	Figitinae			heteropterus	(Hartig, 1843, Psilogaster)
857	syn	species	Figitidae	Figitinae			flavicornis	Hellén, 1937	synonymy by Fergusson (1986).
858	valid	Family	Ibaliidae					Thomson, 1862
859	valid	genus	Ibaliidae			Ibalia		Latreille, 1802
860	syn	genus	Ibaliidae			SAGARIS		Panzer, 1806
861	valid	species	Ibaliidae				leucospoides	(Hockenwarth, 1785, Ichneumon)		England	Ichneumon
862	syn	species	Ibaliidae				cultellator	(Fabricius, 1793, Ichneumon)
863	syn	species	Ibaliidae				ensiger	Norton, 1862
864	syn	species	Ibaliidae				suprunenkoi	Jacobson, 1899
865	syn	species	Ibaliidae				gigantea	Yoshimoto, 1970
866	valid	species	Ibaliidae				rufipes	Cresson, 1879		England, Scotland
867	syn	species	Ibaliidae				drewseni	Borries, 1891
868	syn	species	Ibaliidae				shirmeri	Dalla Torre & Kieffer, 1910
